## Maintaining their genetic distance; limited gene flow between widely hybridising species of *Geum* with contrasting mating systems

Crispin Y. Jordan<sup>1,3,4</sup>, Konrad Lohse<sup>1</sup>, Frances Turner<sup>2</sup>, Marian Thomson<sup>2</sup>, Karim Gharbi<sup>2</sup>, Richard A. Ennos<sup>1</sup>

<sup>1</sup>Institute of Evolutionary Biology, University of Edinburgh, Ashworth Laboratories, Charlotte Auerbach Rd, Edinburgh EH9 3FL, Scotland

<sup>2</sup>Edinburgh Genomics, Ashworth Laboratories, Charlotte Auerbach Rd, Edinburgh EH9 3FL, Scotland

<sup>3</sup>Present Address: University of Edinburgh, Hugh Robson Building, George Square, Edinburgh, EH8 9AG, Scotland

<sup>3</sup>Corresponding author. E-mail: [crispinjordan@gmail.com](mailto:crispinjordan@gmail.com); Fax: 011 44 131 650 2872

Key words: Hybridization, introgression, coalescent, *Geum*, natural selection

Running title: Introgression and mating systems

## Abstract

1 Mating system transition from outcrossing to selfing frequently gives rise to sister lineages with  
2 contrasting outcrossing rates. The evolutionary fate of such lineages depends on the extent to which  
3 they exchange genes. We measured gene flow between outcrossing *Geum rivale* and selfing *G.*  
4 *urbanum*, two sister species derived by mating system transition, which frequently hybridise. A draft  
5 genome was generated for *G. urbanum* and used to develop dd-RAD data scorable in both species.  
6 Coalescent analysis of RAD data from allopatric populations indicated that the two species diverged  
7 2-3 Mya, and that long term gene flow between them has been very low ( $M=0.04$ ). *G. rivale* showed  
8 greater genetic diversity in sympatry than allopatry, but genetic divergence between species was no  
9 lower in sympatry than allopatry, providing little evidence for recent introgression. Clustering of  
10 genotypes revealed that, apart from four early generation hybrids, individuals in sympatric  
11 populations fell into two genetically distinct groups with <1% admixture that corresponded exactly to  
12 their morphological species classification. Although our data suggest limited gene flow, we observed  
13 joint segregation of two putatively introgressed SNPs in *G. urbanum* populations that was associated  
14 with significant morphological variation; this provides tentative evidence for rare introduction of  
15 novel genetic diversity by interspecific gene flow. Our results indicate that despite frequent  
16 hybridisation, genetic exchange between *G. rivale* and *G. urbanum* has been very limited throughout  
17 their evolutionary history.

## 18 Introduction

19 A key factor influencing the evolutionary trajectory of lineages is their level of gene exchange with  
20 related taxa (Abbott *et al.* 2016). A reduction in gene flow facilitates speciation (Coyne & Orr 2004).  
21 Limited gene flow from a related taxon may increase the genetic variability of a species and enable  
22 acquisition of novel traits that enhance its evolutionary potential, while maintaining its distinctness  
23 (Paoletti *et al.* 2006). However, if gene flow is more extensive, species may fuse (Carney *et al.* 2000).  
24 Thus, quantifying gene exchange among lineages is crucial for understanding the birth, continued  
25 evolution and possible extinction of species.

26 Quantifying gene flow between lineages is particularly valuable across lineage pairs that share an  
27 evolutionary transition, allowing patterns of genetic exchange associated with that evolutionary  
28 transition to be recognised. In many plant genera speciation is associated with a mating system  
29 transition from outcrossing to selfing (Stebbins 1957; Igic *et al.* 2006; Wright *et al.* 2013; Barrett *et al.*  
30 2014). Although sister species with contrasting mating systems are typically ecologically distinct,  
31 hybridisation often occurs between them where habitat isolation breaks down or the ranges of the  
32 two taxa meet (e.g. *Mimulus* (Vickery, 1978; Brandvain *et al.* 2014; Kenny & Sweigart 2016),  
33 *Rhinanthus* (Ducarme *et al.* 2010), *Centaureum* (Brys *et al.* 2013)).

34 The transition from outcrossing to selfing affects genome evolution per se (Wright *et al.* 2008) and is  
35 commonly accompanied by changes in floral display (Sicard & Lenhard 2011). Thus the transition can  
36 potentially lead both to post-zygotic barriers to interspecific gene flow, due to interactions between  
37 differently evolved outcrossed and selfed genomes, and to pre-zygotic barriers, through its effect on  
38 mating opportunities (Fishman & Wyatt, 1999; Hu, 2015). Quantitative measurement of  
39 introgression between sister selfing and outcrossing taxa is needed to determine the strength of  
40 these effects, and to ascertain whether they prevent integration of novel genetic material into either  
41 species. Introgression would be particularly important for highly inbreeding taxa whose adaptive

42 potential may be impaired by low genetic variability, and a reduced efficacy of positive and  
43 background selection (Charlesworth *et al.* 1993; Glémin & Ronfort 2013; Arunkumar *et al.* 2015).

44 Here we quantify gene flow between *Geum rivale* and *G. urbanum*, sister species that differ in mating  
45 system and associated floral display (Fig. 1). *Geum rivale*, which typically occupies open, moist  
46 habitats, is predominantly outcrossed (outcrossing rate  $t = 0.8$ ) and possesses a pendulous flower  
47 adapted to bee pollination. In contrast, *G. urbanum*, a plant of shaded, well drained sites, is  
48 predominantly self-fertilised ( $t = 0.15$ ) and bears erect flowers adapted to fly pollination (Taylor  
49 1997a, b; Ruhsam *et al.* 2010).

50 Allopatric populations of both species occur: *G. rivale* in tall herb montane communities in the UK,  
51 and at high latitude sites elsewhere in Europe; *G. urbanum* in the extreme south east of the UK,  
52 where rainfall is low, and at the southern extremes of its distribution in continental Europe (Taylor,  
53 1997a, b). However, over most of their distributions in the UK and continental Europe the taxa are  
54 sympatric. Here they can be found as single species populations in “pure” habitats or together in  
55 “mixed” habitats. Typical mixed habitats include naturally wet woodlands and artificially disturbed  
56 river banks (Waldren *et al.* 1989).

57 In mixed habitats the highly fertile F1 hybrid *G. x intermedium* is widely reported, associated with  
58 hybrid swarms (Taylor 1997a). Detailed analysis of a single hybrid swarm indicated the presence of  
59 both F1 hybrids and early generation backcrosses to *G. rivale* that produce fertile seeds by both  
60 outcrossing and selfing (Ruhsam *et al.* 2011, 2013). The resulting recombinant offspring express no  
61 detectable fitness reduction when grown in a benign environment, but some recombinant types are  
62 not apparently present in the population of established adults in the hybrid swarm (Ruhsam 2013),  
63 perhaps due to selection (Ruhsam *et al.* 2013). Thus, the mating events occurring in mixed habitats  
64 are common and favourable for introgression, particularly via backcrossing to *G. rivale*. However, so

65 far there has been no assessment of whether this has led to significant gene exchange between the  
66 two species.

67 To quantify gene exchange between the two *Geum* taxa we adopt a comparative genomic approach.  
68 We first generate a draft genome of the inbreeding species, *G. urbanum*, which we use to develop a  
69 set of SNP markers common to the two species. These SNPs are then scored in allopatric populations  
70 of both species likely to have been geographically isolated for the past 5ky. We analyse these data in  
71 a coalescent framework to estimate the age of the two taxa and measure interspecific gene flow  
72 from the time at which the species formed to the time when allopatric populations became isolated.  
73 We also use the allopatric samples to identify species-specific diagnostic SNPs.

74 To measure recent gene flow between the *Geum* taxa, in the period since the isolation of the  
75 allopatric populations, we analyse an additional set of samples taken from a broad area of sympatry.  
76 We look for signals of recent genome-wide introgression by comparing nucleotide diversity and  
77 genetic differentiation between the allopatric and sympatric samples. If introgression has occurred,  
78 significant increase in genetic diversity within and reduction in genetic differentiation between  
79 species are expected in sympatric compared to allopatric samples. We applied a clustering approach  
80 to the SNP data to determine the extent of admixture of *G. rivale* and *G. urbanum* genomes within  
81 individuals. Finally, we score the sympatric sample for previously identified species-specific  
82 diagnostic SNPs to quantify hybridisation and introgression at the level of individual genotypes. We  
83 relate these estimates of the hybridity of individuals, based on molecular data, to the morphology of  
84 these individuals measured in a common environment.

85

86 **MATERIALS AND METHODS**

87 ***Sampling***

88 *i. Sampling of Allopatric Populations*

89 Four *G. rivale* individuals were sampled from each of three high elevation tall herb communities  
90 located on three distinct Scottish mountain ranges above the altitudinal limits of *G. urbanum* (Table  
91 S1; Taylor 1997b). One individual was also sampled from a single population in each of northern  
92 Sweden and Iceland where *G. urbanum* is absent (Table S1; <http://linnaeus.nrm.se/flora>).

93 Two *G. urbanum* plants were sampled from each of 10 populations in south-east England (Table S1),  
94 a region where *G. rivale* is absent due to lack of suitable habitats (Preston *et al.* 2002). Single  
95 individuals of *G. urbanum* were also sampled from two areas in Europe where *G. rivale* does not  
96 occur, namely Portugal and south-west France (Table S1; <http://linnaeus.nrm.se/flora>). 0.5 grms  
97 young leaf tissue was removed from sampled plants and stored dry in silica gel prior to DNA  
98 extraction.

99

100 *ii. Sampling of Sympatric Populations*

101 The Botanical Society of Britain and Ireland (BSBI) database was searched for the location of sites  
102 containing *G. rivale* alone (15), *G. urbanum* alone (14), or both taxa (10) in eight contiguous 10km x  
103 10km squares within vice county 81 in the British Isles (Berwickshire) (Fig. 1, Table S2)  
104 (<http://bsbidb.org.uk/maps/>). At each site a single cutting was collected in August 2013 from each of  
105 two plants more than 5m apart, for each of the *Geum* taxa present. Field identification employed  
106 floral, fruit and vegetative characters. Newly emerging leaves (0.1 g.) were taken from each plant and  
107 frozen (-80°C) prior to DNA extraction. Cuttings were rooted in 20cm diameter pots containing

108 commercial potting compost. Ninety six of the 98 cuttings were rooted successfully. Plants were  
109 overwintered outside in a randomised array in Edinburgh to induce flowering in spring 2014.

110

## 111 ***Development of SNP markers via ddRAD***

### 112 *i. DNA extraction*

113 DNA was extracted from dried samples using a modification of Doyle & Doyle (1990)'s CTAB protocol,  
114 while fresh and frozen material was extracted using the DNeasy plant mini prep kit (Qiagen)  
115 following the manufacturer's protocol.

### 116 *ii. Development of draft Genome*

117 We developed a draft genome for the inbreeder, *G. urbanum* to facilitate SNP genotyping with  
118 double-digest Restriction Associated DNA sequencing markers (ddRAD; Peterson *et al.* 2012). We  
119 identified the individual within our Punnetts Town sample (Table S1) that was most homozygous at a  
120 set of 10 microsatellite loci (Arens *et al.* 2004). Using this sample we extracted 17µg of DNA from  
121 150mg of young leaves. Details of the genome sequencing and assembly, which was conducted by  
122 Edinburgh Genomics, are given in the Supplementary Materials.

123 To identify SNPs within the draft genome and estimate coverage per scaffold, trimmed reads were  
124 mapped back to assembled scaffolds using bwa mem version 0.7.5a with -M option (Li & Durbin  
125 2009). 94.0% of reads were aligned to scaffolds. Samtools (Li *et al.* 2009) version 0.1.18 was used to  
126 call variants.

### 127 *iii. ddRAD library prep and sequencing*

128 DNA quality was evaluated using the E-Gel Precast Agarose Electrophoresis System (ThermoFisher  
129 Scientific), and samples quantified using the Qubit dsDNA BR Assay Kit, (ThermoFisher Scientific).

130 Sample preparation, library construction and PCR amplification for double digest RAD sequencing  
131 was modified from Peterson *et al.* (2012) (for full details see Supplementary Materials). Superpools  
132 of PCR products were sequenced either on an Illumina HiSeq 2500 using 125 based paired-end reads  
133 in high output mode (v4 chemistry) or an Illumina MiSeq using 150 base paired-end reads (v2  
134 chemistry).

135 *iv. Quality filtering and preparation of reads from ddRAD*

136 The bioinformatics and analysis pipeline for all ddRAD data is summarized in Figure S1. To match the  
137 read lengths produced by MiSeq and HiSeq Illumina technologies for ddRAD analyses, we used fastx  
138 trimmer ([http://hannonlab.cshl.edu/fastx\\_toolkit/](http://hannonlab.cshl.edu/fastx_toolkit/)) to trim MiSeq reads to 125bp (STACKS requires  
139 reads of equal length). We then de-multiplexed and filtered reads for quality using process\_radtags  
140 (STACKS v 1.21; Catchen *et al.* 2011, 2013). This process removed reads with an uncalled base, and  
141 those with an average quality score below 20 over a sliding window comprising 15% of a read.  
142 Finally, we again trimmed reverse reads to 117bp with fastX trimmer to produce forward and reverse  
143 reads of equivalent length after the 8bp barcode was removed from the forward reads.

144 *v. Aligning reads to draft genome*

145 Both *Geum* species are ancient hexaploids ( $2N = 42$ ), with disomic inheritance (Smedmark *et al.*  
146 2003; Vandepitte *et al.* 2007; Ruhsam *et al.* 2010). Mapping ddRAD sequences from the two *Geum*  
147 species must account for divergence between species to allow reads from both species to map to the  
148 *G. urbanum* draft genome. However, allowing an excessive number of mismatches can cause reads  
149 to map to multiple loci in ancient polyploid taxa, like *Geum*. We explored the effect of varying the  
150 number of allowed mismatches (M) on alignments for one allopatric individual from each species  
151 (Punnetts Town, *G. urbanum*; Ben Lui, *G. rivale*; both sequenced with Illumina HiSeq).



152 For a range of M values, we used GSnap (version 2014-12-16; Wu & Watanabe 2005) to map reads to  
153 the draft genome. We required that reads map uniquely, specified an indel penalty of two, and did  
154 not allow terminal alignments. For the *G. urbanum* sample, between 64.86% to 67.74% of paired-  
155 end (PE) ddRAD reads mapped as proper pairs when we allowed one to nine mismatches (M=1 to 9);  
156 however the percentage of reads that aligned jumped to 82.84% for M=10. Similarly, the percentage  
157 of *G. rivale* PE reads that aligned in proper pairs increased gradually from 39.21% to 58.16% over  
158 M=2 to M=9, with a large increase to 79.93% for M=10. Therefore, the structure of the *Geum*  
159 genome (e.g., due to polyploidy and/or repetitive sequences) appears to present different  
160 environments for aligning ddRAD data at a threshold genetic diversity of ~8.55% (i.e.,  $10/117 * 100$ ,  
161 where 117 equals the read length). Consequently, we performed all subsequent alignments as  
162 above, setting M=6 to avoid this threshold but also allow many reads from *G. rivale* to map to the  
163 heterospecific draft genome.

#### 164 *vi. Assembling radtags and calling SNPs*

165 We used STACKS' ref\_map pipeline (v 1.21; Catchen *et al.* 2011, 2013; Hohenlohe *et al.* 2010) to  
166 assemble the aligned reads into radtags. Next, we used STACKS' rxstacks module to correct genotype  
167 calls based on population-level genotype information using a bounded (error rate) model with the  
168 parameters conf\_lim and bound\_high equal to 0.25 and 0.1, respectively (see  
169 <http://catchenlab.life.illinois.edu/stacks/manual/>).

#### 170 *vii. Identifying and filtering for paralogs*

171 Ancient hexaploidy complicates analyses of *Geum* because reads from paralogous genome regions  
172 could map to identical sites. As a strict filter for identifying genome regions that potentially attract  
173 paralogous reads, we used STACKS' populations module to calculate observed heterozygosity and  $F_{IS}$   
174 at each identified SNP. Thereafter custom scripts were used to collate data and restrict further  
175 analysis to scaffolds free of SNPs that exhibited either excess heterozygosity (>0.5) or negative  $F_{IS}$ .

176 The heterozygosity and  $F_{IS}$  calculations *for this purpose only* considered UK allopatric *Geum* samples  
177 that comprised four individuals from each of three Scottish ‘allopatric’ *G. rivale* populations (12 *G.*  
178 *rivale* individuals), and one randomly chosen individual from each of the 10 Southern England *G.*  
179 *urbanum* populations (Table S1). Nucleotide-level heterozygosity and  $F_{IS}$  were calculated separately  
180 for *G. rivale* and *G. urbanum*; we assumed each set of samples was from a single, large UK  
181 population, despite population structure being evident in both species (see Results). Population  
182 structure reduces the number of heterozygotes compared to a single panmictic population:  
183 therefore, our filters should preferentially remove genomic regions with excess heterozygosity due to  
184 paralogy.

185

## 186 ***Population Genetic Analysis of Allopatric Populations***

### 187 *i. Patterns of Polymorphism within and between species*

188 We characterized polymorphism within and between the *Geum* species using the 12 allopatric UK *G.*  
189 *rivale* samples plus one from each of Iceland and Sweden, and 10 UK *G. urbanum* samples (one from  
190 each allopatric UK population) plus one each from France and Portugal (Table S1). We used STACKS’  
191 populations module to identify SNPs that are polymorphic within at least one species or show a fixed  
192 difference between species. This analysis only considered radtags present in all 26 individuals  
193 described above.

### 194 *ii. Inbreeding coefficients and population differentiation*

195 We applied the STACKS’ populations module to estimate the inbreeding coefficients within each  
196 population ( $F_{IS}$ ) and measure differentiation among populations ( $F_{ST}$ ) for each species using data from  
197 the three allopatric *G. rivale* populations in Scotland (4 individuals/pop) and the ten allopatric *G.*

198 *urbanum* populations in England (2 individuals/pop). Estimates of  $F_{IS}$  and  $F_{ST}$  only considered radtags  
199 present in both species, and that were present in all individuals of a given analysis.

200 *iii. Identification of species-specific SNPs*

201 We used alternately fixed SNPs in allopatric populations of the two taxa (identified in (i.) above) to  
202 provide an initial list of species-specific SNPs. To minimize linkage between diagnostic SNPs and  
203 obtain an estimate of introgression across the whole genome, we selected one (the first) alternately  
204 fixed SNP per scaffold for the introgression analysis. However, we note that by using the first SNP per  
205 scaffold, we bias our data against (larger) well-assembled scaffolds. Therefore, we repeated our  
206 analyses of introgression using all available species-diagnostics SNPs to test for an effect of such bias,  
207 and obtained qualitatively identical results (not shown).

208 *iv. Coalescent analysis of gene flow during lineage divergence*

209 We used an analytic likelihood framework to assess the support for alternative models of divergence  
210 between *G. rivale* and *G. urbanum* with and without gene flow. The method is described in Lohse *et*  
211 *al.* (2016). Briefly, the analysis is based on a single diploid individual for each species and considers  
212 the blockwise site frequency spectrum, i.e. the joint frequencies of four polymorphism types (as in  
213 “*Patterns of Polymorphism within and between species*”, above) in short blocks of sequence: i )  
214 heterozygous sites exclusive to *G. rivale*, ii ) heterozygous sites exclusive to *G. urbanum*, iii)  
215 heterozygous sites shared by both species and iv) fixed differences between species. We counted  
216 these site types within 117bp radtags (block), and treated each radtag as an independent block. For  
217 randomly mating populations, the polymorphisms at each block represent an independent outcome  
218 of the coalescent process, which is a function of the species’ history. Since STACKs ignores RAD tags  
219 that are monomorphic, we conditioned the likelihood on only observing variable blocks. To do this,  
220 we normalized the probability of each blockwise mutational configuration by  $1-p_{IBS}$ , where  $p_{IBS}$  is  
221 the probability of identity in state for a block.

222

223 We primarily wish to test for historical introgression between *G. rivale* and *G. urbanum*. Therefore,  
224 we compared three models: (1; “div<sub>2</sub>”) species diverged at time  $T$  with no introgression, (2; “IM<sub>u→r</sub>”) a  
225 history of divergence with gene flow from *G. urbanum* to *G. rivale* and (3; “IM<sub>r→u</sub>”) divergence with  
226 gene flow from *G. rivale* to *G. urbanum* (4 parameters). All models assume instantaneous species  
227 divergence and a constant  $N_e$  within taxa. We also constrained the effective size of the ancestor to  
228 equal that of *G. rivale*. To capture the decrease of  $N_e$  expected to result from the transition to  
229 inbreeding (Charlesworth & Wright 2001), we allowed  $N_e$  to differ between *G. urbanum* and the  
230 other taxa (the ancestor of *G. rivale* and *G. urbanum* is most likely outcrossing given the rarity of  
231 transitions from self-compatibility to self-incompatibility; Igic et al. 2006). Migration was modelled  
232 as a constant rate  $M = 4N_{anc} \times m$  individuals per generation. We converted estimates of  $T$  into years  
233 using  $t = T \times 2N \times g$  where  $g$  is generation time and  $N = \theta/4\mu$ . We assumed a mutation rate estimated  
234 for *Arabidopsis thaliana*,  $\mu = 7 \times 10^{-9}$  (Ossowski et al. 2010), and an average generation time across  
235 the two species of 3 years (Taylor 1997a, b) (generations are likely longer in *G. rivale* than in *G.*  
236 *urbanum*).

237 Inbreeding complicates this analysis because it reduces genetic diversity within individuals relative to  
238 the population level. To minimize the confounding effect of inbreeding on the analyses, we initially  
239 chose the most outbred individuals for analysis. We used a recently outcrossed *G. urbanum*  
240 individual (see Results; population Mill Wood), which had genetic diversity ( $\pi = 0.0009 \pm 0.0001$ )  
241 similar to the UK allopatric *G. urbanum* populations as a whole (see Results) and so may adequately  
242 represent the diversity of this species in the UK. “Leaky” self-incompatibility also introduces  
243 variation in inbreeding among individuals of *G. rivale*. Therefore, we conducted separate analyses  
244 that paired the outbred *G. urbanum* Mill Wood individual with 3 allopatric UK samples of *G. rivale*  
245 that span a range of heterozygosity to examine how inbreeding in *G. rivale* affects our conclusions.  
246

247 Maximum likelihood estimates under each model were obtained in *Mathematica* v. 10.2 (see File S2  
248 of Lohse *et al.* 2016). To estimate 95% CI for M and T, we obtained discretized marginal support  
249 (logarithm of the likelihood) curves for these parameters (maximising the likelihood for all other  
250 parameters at each point).

251

## 252 ***Population Genetic Comparison of Allopatric and Sympatric Populations***

### 253 *i. Genetic diversity in allopatric and sympatric populations*

254 To determine whether potential genetic exchange in sympatric populations resulted in an increase in  
255 genetic diversity, we estimated genetic diversity ( $\pi$ ) in UK allopatric and Berwickshire samples  
256 (pooling Berwickshire's 'pure' and 'mixed' populations) of each species using STACKS' populations  
257 module (providing mean and standard error, S.E.). The analysis considered radtags present in at  
258 least half of individuals for each species/population type (allo- vs sympatric) combination; we  
259 obtained qualitatively similar results when we restricted the analysis to radtags present in all  
260 individuals (not shown). The analysis excluded four individuals in the Berwickshire sample identified  
261 as obvious early generation hybrids or backcrosses (see Results). This analysis therefore involved 12  
262 allopatric *G. rivale*, 20 allopatric *G. urbanum*, 48 sympatric *G. rivale* and 45 sympatric *G. urbanum*  
263 samples.

### 264 *ii. Genetic differentiation between taxa in allopatry and sympatry*

265 To test whether potential gene exchange resulted in less differentiation between the species in  
266 sympatric populations, we calculated genetic differentiation  $d_{xy} = \Sigma[(PX * (1-PY)) + ((1-PX) * PY)] / n$   
267 between the two species, separately for allopatric and sympatric samples: P represents the  
268 frequency of a focal allele in the sample of species X and Y, and n is the sequence length (Nei & Li  
269 1979; Cruickshank & Hahn 2014). These calculations considered the same samples as used to  
270 calculate genetic diversity ( $\pi$ ), described above. We estimated  $d_{xy}$  for each scaffold, which we

271 assume to be independent with respect to linkage and determined the mean  $d_{xy}$  and its S.E. across  
272 scaffolds. All analyzed radtags were present in at least 12 individuals for each species/population  
273 type combination, and the same scaffolds were analyzed in allopatric and sympatric estimates of  $d_{xy}$   
274 (n=418 scaffolds).

## 275 ***Genetic Analysis of Hybrids and Introgression in Sympatric Populations***

### 276 *i. Cluster analysis using fastSTRUCTURE*

277 As a first approach to analyzing introgression between the two *Geum* taxa in sympatry, we used  
278 genotypic clustering implemented in fastSTRUCTURE (Raj *et al.* 2014). Our analysis assumed that  
279 samples derived from two populations (i.e., K=2) corresponding to the two *Geum* species, with the  
280 possibility of genetic admixture of individuals. The SNP data was derived from a STACKS analysis of all  
281 92 successfully genotyped individuals in the sympatric Berwickshire sample together with data from  
282 the British and European allopatric populations of the two species. We analyzed two datasets that  
283 differed in degree of filtering: (1) SNPs were present in any fraction of individuals, which led to  
284 greater numbers of SNPs but missing values for some individuals, and (2) all SNPs were present in all  
285 individuals. Both analyses used SNPs that had been filtered for paralogs, and considered only a single  
286 SNP per scaffold to minimize the effect of linkage between SNPs.

### 287 *ii. Identifying hybrids and introgressed individuals using species-specific SNPs*

288 In our second approach to analyzing recent introgression we used custom scripts and the species-  
289 specific SNPs identified in (iii.) (above) to estimate the fraction of alleles in each individual within the  
290 sympatric Berwickshire sample that is *G. rivale* in origin (Hybrid Index). SNPs with either un-callable  
291 genotypes (based on STACKS' likelihood algorithm) or third alleles (e.g., due to sequencing or  
292 alignment error) were excluded from the calculations. We simultaneously tabulated the frequency  
293 of SNPs that were heterozygous for the species-diagnostic alleles in each individual.

294 In general, our analyses did not specify minimum coverage because STACKS accounts for coverage  
295 when calling genotypes (or leaving a genotype uncalled) (Hohenlohe *et al.* 2010; Catchen *et al.* 2013).  
296 However, to check whether specifying minimum coverage would alter our results, we repeated our  
297 analyses, requiring a minimum coverage of 20 in all analysed individuals when running  
298 fastSTRUCTURE and creating the panel of species-diagnostic SNPs. This quartered the number of  
299 species-diagnostic SNPs, but yielded qualitatively identical results (not shown).

### 300 ***Analysis of Morphological Variation in Sympatric Populations***

#### 301 *i. Measurement of morphological variation in sympatric populations*

302 From the beginning of April 2014 plants grown from cuttings from sympatric populations were  
303 monitored weekly for flowering. From each plant a newly opened flower and the stipule located on  
304 the flowering stem immediately below the flower were sampled. The following characters, which  
305 discriminate between *G. rivale* and *G. urbanum*, were measured: angle at which flowers are held  
306 (degrees from vertical) (FA), petal length (PL) (mm), petal width (PW) (mm), petal shape (PS)  
307 (proportional height of widest part of petal)), sepal length (SL) (mm), stamen number (SN), stipule  
308 length (STL) (mm) and stipule width (STW) (mm) (Ruhsam *et al.* 2011, 2013).

#### 309 *ii. Statistical analysis of morphological data*

310 Principal Component Analysis (PCA) was conducted on the total sympatric sample using data on all  
311 eight morphological characters measured. Morphologically distinct groupings were recognised on  
312 scatterplots of the first two principal component scores and related to parental species and hybrid  
313 classes defined genetically by species-specific SNPs. PCA based on the same characters was also used  
314 to summarise morphological variation separately within *G. urbanum*. GLMs were used to test for the  
315 effect of two SNP variants, putatively jointly introgressed from *G. rivale* (see results), on the first two  
316 principal component scores for *G. urbanum*. All statistical analyses were conducted in Minitab 16.

317

## 318 **RESULTS**

### 319 ***Development of SNP markers via ddRAD***

#### 320 *i. Draft Genome*

321 The genome assembly contained a total of 170,030 scaffolds, with an N50 of 24.6Kb and total  
322 assembly size of 1.2Gb. In order to identify signs that scaffolds represent multiple copies of the  
323 genome, the distributions of coverage per scaffold and percent variant bases per scaffold was  
324 assessed. Scaffolds of length less than 10Kb were excluded, leaving 32,182 scaffolds (with a total  
325 length of 909 Mb). The distribution of percent variant bases per scaffold is shown in Figure S2, and  
326 the distribution of coverage per scaffold is shown in Figure S3. Coverage per scaffold follows a  
327 roughly normal distribution, which would be expected if the scaffolds mostly represented the same  
328 number of copies of the genome.

329 Core genic regions were well assembled, and appeared to be present in approximately three  
330 (haploid) copies as expected for an ancient hexaploid. We searched our assembled genome for 248  
331 ultra-conserved eukaryotic genes (CEGs), listed by Parra *et al.* (2007), using their Core Eukaryotic  
332 Genes Mapping Approach. We identified 93% and 97% of the core genes that were complete or  
333 partially complete, respectively. On average, complete and partially complete CEGs were  
334 represented by 3.39 and 3.82 orthologs per CEG, respectively, with at least 90% of CEGs represented  
335 by more than one ortholog.

#### 336 *ii. ddRAD tags*

337 Following quality filtering,  $2.7 * 10^7$  reads remained in the MiSeq data, and between  $6.0 * 10^7$  and  $7.3$   
338  $* 10^7$  reads remained that derived from the five HiSeq libraries. Following alignments, assembling  
339 radtags with STACKS, and applying corrections with rxstacks, our dataset included 230,356 radtags



340 for *G. rivale* and *G. urbanum*, collectively. However, coverage was highly stochastic. For example,  
341 only ~2% (4524) of radtags were represented in more than one half of our samples.

### 342 *iii. Identifying and filtering for paralogs*

343 When the STACKS' populations module was used to analyse the raw SNP data from the allopatric  
344 populations of the inbreeding taxon *G. urbanum*,  $F_{IS}$  estimates were low and sometimes negative,  
345 which is unexpected for a highly inbreeding species. This suggests that paralogous reads have  
346 mapped to identical locations and thereby increased individual heterozygosity (see Table S4). We  
347 therefore applied our filter for paralogy (rejecting 1344 scaffolds with SNPs that exhibit either excess  
348 heterozygosity ( $>0.5$ ) or negative  $F_{IS}$ ) and, unless specifically noted, we henceforth only present  
349 results from paralogy-filtered SNPs.

## 350 ***Population Genetic Analysis of Allopatric Populations***

### 351 *i. Patterns of polymorphism within and between species*

352 The majority of SNPs in the dataset were polymorphic in *G. rivale* but invariant in *G. urbanum*. This  
353 type of polymorphic site occurred approximately four times more frequently than the reverse case  
354 (Table 1). 22% of SNPs were alternately fixed between the species (Table 1) and only 1.5% of SNPs  
355 were shared polymorphism (Table 1).

356

### 357 *ii. Inbreeding coefficients and population differentiation*

358 For the allopatric populations sampled in Britain we obtained  $F_{IS}$  estimates close to 0.25 for *G. rivale*,  
359 consistent with leaky self-incompatibility (Ruhsam *et al.* 2010), and  $F_{IS}$  greater than 0.9, consistent  
360 with very high selfing rates, for eight of the ten UK 'pure' *G. urbanum* populations (Table 2). Among  
361 the two *G. urbanum* populations with low  $F_{IS}$ , the first population (Mill Wood  $F_{IS} = 0.0845$ ), included  
362 one (of the two) sample(s) that was heterozygous at 92% of the 71 polymorphic SNPs analysed,

363 suggesting that this sample was derived from a recent outcrossing event between two diverged  
364 inbred lines. In the second population, Selwyn Wood, only one SNP was recorded as polymorphic,  
365 suggesting that this population may have been founded by few (possibly a single) highly selfing  
366 individuals.

367 Allopatric populations of *G. rivale* in Britain exhibited less population differentiation than *G. urbanum*  
368 populations (mean pairwise  $F_{ST}$  0.13 and 0.38 respectively), as expected from their contrasting  
369 breeding systems.

### 370 *iii. Coalescent analysis of gene flow during lineage divergence*

371 Table S5 summarizes the numbers of each polymorphism type and blocks analysed for the *G.*  
372 *urbanum* - *G.rivale* sample pairs. All three pairs had approximately 1400 SNPs distributed among ca.  
373 660 blocks (i.e., radtags). Model comparisons for all three sample pairs reject a model of strict  
374 divergence, and suggest that introgression has occurred between the *Geum* species (Table 3), but at  
375 a very low rate (see below). For two sample pairs (involving *G. rivale* samples Ben Lui 1 and Ben  
376 Lawers 5), the model of gene flow from *G. rivale* to *G. urbanum* (i.e.,  $IM_{r \rightarrow u}$ ) fit the data significantly  
377 better than the model of strict divergence (i.e.,  $div_2$ ), whereas the model  $IM_{u \rightarrow r}$  does not fit  
378 significantly better than  $div_2$  (Table 3). Models that include gene flow ( $IM_{r \rightarrow u}$  and  $IM_{u \rightarrow r}$ ) also fit the  
379 data significantly better than the  $div_2$  model for the third pair (involving sample Ben Lui 4), but  $IM_{r \rightarrow u}$   
380 and  $IM_{u \rightarrow r}$  have effectively equal support (Table 3). Results from this latter pair likely differ from the  
381 former pairs because it includes a single block with a shared heterozygous site, while the other  
382 sample pairs lack shared heterozygous sites (Tables S5, S6). As Ben Lui 4 is likely the most  
383 heterozygous *G. rivale* sample (Table S5), we focus on this pair, but note that parameter estimates  
384 (Table S6) and general conclusions (i.e., support for very low introgression rates) are similar for all  
385 three sample pairs.

386

387 The three models ( $div_2$ ,  $IM_{r \rightarrow u}$ ,  $IM_{u \rightarrow r}$ ) yield similar estimates of  $N_e$  and divergence time (Ben Lui 4 pair:  
388 Table 4; all three sample pairs: Table S6). In general,  $N_e$  of *G. urbanum* is a half to a quarter of that  
389 of *G. rivale* (and their common ancestor), and all three models suggest that the species diverged  
390 approximately 2 to 3 million years ago (Table 4; Table S6). Models  $IM_{u \rightarrow r}$  and  $IM_{r \rightarrow u}$  both suggest a  
391 low but significant long-term rate of effective gene flow ( $M \approx 0.04$ ), of approximately one migrant  
392 every 25 generations (Table 4; see Table S6 for  $M$  for additional sample pairs).

393

### 394 ***Population Genetic Comparison of Allopatric and Sympatric Populations***

#### 395 *i. Genetic diversity in allopatric and sympatric populations*

396 Estimates of genetic diversity ( $\pi$ ) were based on 826 radtags, each 117 base pairs in length, totaling  
397 96 642 base-pairs; as these radtags were the same as those used to develop species-diagnostic SNPs,  
398 they occur in both species. Genetic diversity was greater in *G. rivale* (mean  $\pi \pm$  SE: 'allopatric'  $0.0044$   
399  $\pm 0.0001$ ; Berwickshire  $0.0048 \pm 0.0001$ ) than *G. urbanum* ('allopatric'  $0.0011 \pm 0.0001$ ; Berwickshire  
400  $0.0011 \pm 0.0001$ ), and was similar between population types for *G. urbanum*. However *G. rivale*  
401 genetic diversity was slightly greater for sympatric than allopatric samples. Since STACKS ignores  
402 monomorphic radtags, we note that these estimates of  $\pi$  should be interpreted in terms of relative,  
403 but not absolute diversity (see also Arnold *et al.* 2013).

404

#### 405 *ii. Genetic differentiation between taxa in allopatry and sympatry*

406 Genetic differentiation between *G. rivale* and *G. urbanum* is similar for UK allopatric and sympatric  
407 samples (mean  $d_{xy}$  (+/- SE) equals  $0.0115 \pm 0.0005$  and  $0.0112 \pm 0.0005$ , respectively). Again, we  
408 note that, due to the fact that STACKS' ignores monomorphic radtags, these estimates should be  
409 viewed as relative measures (and upper limits) of  $d_{xy}$ , and not as absolute estimates.

410 ***Hybrids and Introgression in Sympatric Populations***

411 *i. Cluster analysis using fastSTRUCTURE*

412 *fastSTRUCTURE* analysis that considered SNPs present in either all (188 SNPs) or a proportion of (492  
413 SNPs; results not shown) individuals analysed in the combined allopatric and sympatric populations  
414 yielded highly consistent results. Figure 2 illustrates *fastSTRUCTURE* results for analyses based on  
415 188 SNPs. All except one of the 36 individuals in the allopatric populations, and all except 4 of the 96  
416 individuals in the sympatric populations, show less than 1% admixture. In the sympatric population Q  
417 values (proportion of *G. rivale* genome) of the four individuals with substantial admixture are 0.496,  
418 0.517, 0.663 and 0.935. On the basis of these Q values there is no evidence for significant  
419 introgression from *G. rivale* into *G. urbanum*. The substantially admixed individuals present are likely  
420 to be recently formed F1 or F2 hybrids, and different generations of backcrosses to *G. rivale*.

421 *ii. Identifying hybrids and introgressed individuals using species-specific SNPs*

422 To initially assess the ability of the species-specific SNPs to discriminate the species, we genotyped  
423 the 10 British allopatric *G. urbanum* samples that had not been used to generate species-diagnostic  
424 SNPs. 215 out of 220 diagnostic SNPs were homozygous for the *G. urbanum* allele in all individuals.  
425 Five SNPs were homozygous for the putative *G. rivale* allele in one or more of the 10 *G. urbanum*  
426 individuals, indicating that these SNPs were not fixed between species. They were removed from  
427 subsequent analysis of 96 individuals of *Geum* from the 39 sites sampled within the sympatric  
428 Berwickshire population. The mean number of SNPs successfully scored per individual was 207.3  
429 (range 161 – 215 Figure S5). The variation in hybrid index (HI) in the Berwickshire population is  
430 illustrated in Figure 3.

431 The vast majority of individuals in the total sympatric sample (92 out of 96) have genotypes in which  
432 more than 97% of the species-specific SNPs are derived from only one of the two *Geum* species.  
433 Individuals possessing >97% *G. rivale* variants are hereafter regarded as *G. rivale*, while plants with

434 >97% *G. urbanum* variants are classified as *G. urbanum*. The four remaining individuals with  
435 substantial proportions of variants from both species correspond to the four early generation hybrids  
436 identified in the fastSTRUCTURE clustering analysis. The correlation between the Q values calculated  
437 by fastStructure and the hybrid index calculated here is high ( $r=0.99$ ) (see Figure S6 for comparison  
438 using 188 SNPs), in part because some SNPs (i.e., 61 of the 492 SNPs available for fastSTRUCTURE  
439 analysis) are common to both analyses. Early generation hybrids were significantly associated with  
440 'mixed' rather than 'pure' sites within Berwickshire (Fisher's exact test,  $P=0.044$ ).

441 Neither of the two individuals possessing a hybrid index close to 0.5 are heterozygous at all SNPs, the  
442 situation anticipated if they were simple F1 hybrids (Table 3). Instead they are homozygous at a  
443 substantial fraction of the species-specific SNPs (15% and 18%), suggesting that they may have been  
444 derived by selfing of F1 hybrids. Two further individuals contain alleles derived predominantly from  
445 *G. rivale*, but additionally possess a substantial complement of *G. urbanum* alleles (29% and 12%  
446 respectively) (Table 5). On the basis of their complement of alleles alone, these plants are most likely  
447 to represent first and second generation backcrosses to *G. rivale* respectively. However, their origin  
448 must again be more complex, possibly involving selfing, because a substantial fraction of the *G.*  
449 *urbanum* alleles they possess (10% and 33% respectively) are present in homozygous form, whereas  
450 if they had been simple backcrosses, all *G. urbanum* alleles would have been present as  
451 heterozygotes.

452 Among the 92 plants from Berwickshire possessing a preponderance (>97%) of species-specific alleles  
453 from one taxon, 33 of the 47 individuals assigned to *G. rivale* and 26 of the 45 plants assigned to *G.*  
454 *urbanum* possessed from 1 to 10 alleles classified as specific to the alternate species (Fig. S7). These  
455 could represent alleles that have introgressed, or alternatively alleles present at low frequency in the  
456 focal species that have not been detected in the limited sample of allopatric genotypes used to  
457 identify species-specific SNPs. The maximum frequencies of putatively introgressed alleles are low

458 (9.6% and 14.4% in *G. rivale* and *G. urbanum* respectively). Furthermore 76% are polymorphic in *G.*  
459 *rivale* only, 20% are polymorphic in *G. urbanum* only, and 4% are polymorphic in both species. These  
460 proportions are not significantly different from those found in the total sample of SNPs scored  
461 ( $P>0.05$ , Table 1). Therefore, misclassification of species-specific SNPs rather than introgression is the  
462 most likely explanation for the apparent presence of up to 3% admixture in the *Geum* genomes from  
463 sympatric populations.

464 With one exception, the putatively introgressed alleles discussed above were randomly associated  
465 with each other within each of the sympatric *G. rivale* and *G. urbanum* populations. However, two  
466 SNPs at radtags 20454 and 24791 respectively, and originally classified as specific to *G. rivale*,  
467 showed complete association in genotypic state within sympatric *G. urbanum*. The alleles were  
468 present at a mean frequency of 14.4% and distributed across six sites. In six individuals both alleles  
469 were present in homozygous form, while a seventh individual was heterozygous at both radtags.  
470 Since the SNPs involved are located on different scaffolds, these results may indicate the presence of  
471 a section of genome spanning the two scaffolds, possibly derived from *G. rivale*, which is segregating  
472 in the *G. urbanum* population.

### 473 ***Analysis of Morphological Variation in Sympatric Populations***

#### 474 *i. Correspondence between Phenotypic and Genotypic classification*

475 Morphological measurements of eight floral and vegetative characters commonly used to distinguish  
476 *G. rivale* and *G. urbanum* were obtained from 87 of the 96 individuals from Berwickshire that had  
477 been scored for species-specific SNPs. The results of Principal Component Analysis based on these  
478 morphological data are illustrated in Figure 4. The first two principal components, accounting for  
479 82.4% and 6.7% of the variation respectively, distinguish two major groups, with two individuals  
480 falling between these on the first PCA axis. Individuals classified as *G. rivale* (N=43) and *G. urbanum*  
481 (N=40) on the basis of species-specific SNPs fall clearly into the two major groups with +ve and -ve

482 PCA1 values, respectively. The two individuals with intermediate PCA1 scores correspond to the early  
483 generation hybrids identified with clustering and species-specific SNPs. The two genotypes identified  
484 as complex backcrosses to *G. rivale*, on the basis of species-specific SNPs, group morphologically with  
485 individuals classified as *G. rivale* on the PCA plot.

486

487 *ii. Morphological Variation and Putative Introgression*

488 To determine whether presence of putatively introgressed genetic material marked jointly by alleles  
489 at radtags 20454 and 24792 affected the morphology of *G. urbanum* (see above), data on the eight  
490 floral and vegetative characters measured in the sympatric *G. urbanum* population were used to  
491 generate the first two principal component scores describing morphological variation. Analysis of  
492 variance showed no significant effect of joint presence/absence of the alleles on PCA1, but a  
493 significant effect on PCA2 score ( $F_{1,38} = 8.67$ ,  $P=0.005$ ; Fig.5). Individuals of *G. urbanum* jointly  
494 possessing these alleles showed a significantly larger flower angle than those lacking them (91.4 vs.  
495 60.8 degrees,  $p=0.018$ ). Greater flower angle is a feature characteristic of *G. rivale* and is most  
496 heavily weighted in PCA2.

497

498

499

500 **DISCUSSION**

501 We have developed a set of sequence based markers in two closely related non-model plant species  
502 with contrasting mating systems that share a polyploid history. Analysis of the markers across  
503 allopatric, and pure and mixed sympatric samples of *G. rivale* and *G. urbanum* indicate that the  
504 species are 2-3MY old, and that levels of introgression between the species, both before and after  
505 the period of recent sympatry, have been very small. While hybrid genotypes continue to be  
506 produced in contemporary populations, the proportion of introgressed loci across the genomes of  
507 the vast majority of individuals is much lower than 3%.

508 The development of sequence based markers, using next generation sequencing, poses technical  
509 problems in our *Geum* species. Their genomes are large (1.2 and 1.6 Gb in *G. urbanum* and *G. rivale*  
510 respectively) and although inheritance is disomic the species are ancient hexaploids. This means that  
511 there will generally be three closely related copies of every sequence, creating significant difficulties  
512 in distinguishing homologs from paralogs (Smedmark *et al.* 2003). We adopted the ddRAD technique  
513 that allows modulation of the number of RAD tags generated per genome to ensure adequate depth  
514 of coverage (Peterson *et al.* 2012). To maximize the chance of distinguishing homologs and paralogs  
515 we used paired end sequencing yielding long reads, and generated a draft genome of the largely  
516 homozygous inbreeding species against which to map our ddRADtag sequences. During the data  
517 analysis phase we employed very rigorous filtering of scaffolds and SNPs to exclude paralogs, which  
518 removed about three-quarters of scaffolds from our dataset. This filtering contributed to the  
519 development of a modest number of SNPs compared to comparable studies in other genera (e.g.  
520 *Populus*, Christe *et al.* 2016; *Betula*, Zohren *et al.* 2016), but that was nevertheless orders of  
521 magnitude higher than for previous microsatellite based studies; moreover, we developed sufficient  
522 SNPs to yield high precision estimates of introgression (e.g., 200 SNPs can estimate introgression of



523 0.5%). Furthermore our RAD data gave estimates of both inbreeding coefficients and population  
524 genetic differentiation that are congruent with results from microsatellite markers, providing  
525 confidence in the conclusions drawn from their analysis (Ruhsam *et al.* 2010, 2013).

526 Coalescent analyses of RAD data from allopatric populations, which contrast the fit of simple models  
527 of the species' histories to polymorphism data, gave species' age estimates of between 2 and 3  
528 million years. This is considerably older than some estimates of time of divergence for other sister  
529 taxa that possess contrasting outcrossing and selfing mating systems. These range from 50 - 100kya  
530 for *Capsella grandiflora* and *C. rubella* (Brandvain *et al.* 2013) through 500-1100kya for *Mimulus*  
531 *guttatus* and *M. nasutus* (Aeschbacher *et al.* 2016) to 1Mya for *Arabidopsis lyrata* and *A. thaliana*  
532 (Tang *et al.* 2007). Our estimated age of the *Geum* species is consistent with the numerous  
533 morphological and physiological differences that are exhibited between them (Taylor 1997a, b).  
534 However despite their age, *G. rivale* and *G. urbanum* apparently exhibit few intrinsic hybrid  
535 incompatibilities (Ruhsam *et al.* 2013); these observations parallel those from *Drosophila* species,  
536 which show few post-zygotic incompatibilities for species of a similar age (Coyne & Orr 1989, 1997).  
537

538 Coalescent analyses also show that low levels of effective introgression are likely to have occurred  
539 between the *Geum* species up to the time of isolation of allopatric populations, but there is no strong  
540 signal of introgression in a particular direction. For clarity,  $M$  measures the long-term effective  
541 migration, and accounts for reduced gene migration due to selection against hybrids (see below).  
542 Our estimate of the introgression rate between the *Geum* species ( $M=0.04$  diploid genomes per  
543 generation) is an order of magnitude lower than that estimated for ancient introgression from  
544 inbreeding *M. nasutus* into outcrossing *M. guttatus* ( $M=0.1-1$ ; Aeschbacher *et al.* 2016) and between  
545 outcrossing and selfing subspecies of *Clarkia* in their secondary contact zone ( $M=0.897-0.169$ ;  
546 Pettergill & Moeller 2012). It is many orders of magnitude below contemporary estimates of

547 unidirectional gene migration from the inbreeding rice *Oryza nivaria* to its outcrossing relative *O.*  
548 *rufipogon* ( $M=2.3 \times 10^5$ ; Zhou *et al.* 2008).

549  
550 Our coalescent analyses necessarily rely on simplifying assumptions. First, the blockwise site-  
551 frequency spectrum approach we adopted assumes a constant  $N_e$  and  $\mu$  across blocks and so ignores  
552 effects of heterogeneity in mutation rate and the effects of background selection on linked sites,  
553 which could lead to a spurious signal of introgression (Ewing & Jensen 2016). Second, our models are  
554 drastic simplifications of the history of these species and, in particular, assume constant  $N_e$  in *G.*  
555 *rivale* and the ancestral population, which is unrealistic given the climatic fluctuations and the  
556 associated range shifts of European taxa during the Pleistocene. Following species divergence, either  
557 a change in  $N_e$  or introgression can alter the joint site-frequency spectrum (Chen 2012); by assuming  
558  $N_{anc} = N_{riv}$ , we potentially conflate changes in  $N_e$  with introgression, which, again, could lead to a  
559 spurious signal of introgression. Given these issues and the low estimates of introgression, we do not  
560 interpret the support of IM models over the  $div_2$  model as strong evidence for ancient long-term  
561 gene flow between the *Geum* species.

562  
563 As a first test of more recent introgression in *Geum* we conducted comparisons of genetic diversity  
564 and differentiation between species in allopatry vs. sympatry. Introgression, which is only possible in  
565 sympatric populations, can potentially increase genetic diversity of the recipient species, and erode  
566 genetic differences between species. Hence, our comparisons of  $\pi$  and  $d_{xy}$  between sympatric and  
567 allopatric populations can provide evidence for or against introgression. Relative genetic diversity  
568 was greater for *G. rivale* than *G. urbanum*, as expected based on their different mating systems  
569 (Charlesworth 2003). In addition, genetic diversity was approximately 9% higher for *G. rivale* in  
570 sympatry than in allopatry, but was equal between population types for *G. urbanum*. While this is  
571 consistent with introgression into *G. rivale*, but not *G. urbanum*, other factors could account for this

572 result, including a greater effective population size of *G. rivale* in sympatry than in allopatry.  
573 Furthermore, genetic differentiation between species ( $d_{xy}$ ) was similar in sympatry and allopatry,  
574 providing no evidence for introgression.

575

576 As a second test of recent introgression we analysed the genomic composition of individuals from a  
577 region of sympatry in Berwickshire and compared them with samples from isolated, reference  
578 populations. The cluster analysis performed by fastSTRUCTURE (which did not rely exclusively on  
579 species-diagnostic SNPs), and the analysis based on a limited subset of species-diagnostic SNPs  
580 identified the same four individuals as early hybrids and backcrosses, and yielded similar genomic  
581 composition estimates that were congruent with morphological classifications. Critically, they  
582 suggest that the upper limit for the proportion of introgressed genome present in Berwickshire  
583 plants is ~3%. However, the real value for introgression is likely to be lower because the assumption  
584 that all our species diagnostic SNPs are alternately fixed between the species is unlikely to be true.

585

586 Although our overall results indicate very little recent genetic exchange, one intriguing result  
587 provides tentative evidence for introgression from *G. rivale* to *G. urbanum*. Two SNP variants located  
588 on different scaffolds that were classified as specific to *G. rivale* in allopatry show co-segregation  
589 within the sympatric *G. urbanum* population. Moreover, *G. urbanum* individuals possessing these  
590 alleles show a significantly greater flower angle, a characteristic of *G. rivale*. A possible explanation is  
591 introgression of a chromosome segment from *G. rivale* into *G. urbanum* that is now polymorphic  
592 within the sympatric population. Given the absence of evidence for backcrossing of hybrids to *G.*  
593 *urbanum* (Ruhsam *et al.* 2011, 2013), such introgression could only arise through the establishment,  
594 following hybridisation, of a self-fertilising lineage that largely retains genetic material from *G.*  
595 *urbanum*. Previous work has shown that F1 hybrids are self-compatible and a proportion may be  
596 capable of autopolllination, so this scenario, though unlikely, is not impossible (Ruhsam *et al.* 2013).

597  
598 Despite the reproductive barrier that adoption of a selfing mating system naturally imposes (Martin  
599 & Willis 2007; Briscoe Runquist *et al.* 2014; Brys *et al.* 2014), the widespread occurrence of the F1  
600 hybrid *G. intermedium* throughout the area of sympatry of *G. rivale* and *G. urbanum* in Berwickshire  
601 and elsewhere (Preston *et al.* 2002), and our own detection of early generation hybrids, indicates  
602 that low levels of introgression are not caused by lack of opportunity for hybridisation. Previous  
603 studies have shown that where hybridisation occurs, a wide array of fertile recombinant offspring are  
604 produced both by backcrossing with *G. rivale* and by self-fertilisation and that under benign  
605 conditions these show little evidence of intrinsic genetic incompatibility (Ruhsam *et al.* 2011, 2013).  
606 Thus *G. rivale* and *G. urbanum* join a growing list of sister species which readily produce F1 hybrids  
607 and viable recombinant offspring, yet show little or no signal of introgression (e.g. *Encelia* (Kyhos *et*  
608 *al.* 1981); *Quercus*, *Arctostaphylos*, *Iris* (Nason *et al.* 1992); *Rhododendron* (Milne *et al.* 2003);  
609 *Begonia* (Twyford *et al.* 2015); *Populus* (Christe *et al.* 2016); *Bombina* (Nürnbergger *et al.* 2016).  
610  
611 In many of the above examples ecological selection against recombinants has been invoked to  
612 explain the maintenance of species distinctions. There are good grounds for proposing the same  
613 explanation to account for lack of introgression in *Geum*. Since their initial divergence the *Geum*  
614 species have evolved marked differences in pollination syndrome, phenology, vegetative morphology  
615 and many aspects of physiology including tolerance of shade and waterlogging (Waldren *et al.* 1988;  
616 Taylor 1997a, b). Therefore multiple ecologically important characters could potentially be the  
617 targets of selection against recombinant individuals in natural populations (Nosil *et al.* 2009).  
618 Selection may be particularly effective in the self-fertilising recombinants that are required to allow  
619 introgression from *G. rivale* into *G. urbanum*. Here reduced effective recombination rates will lead to  
620 correlated selective effects across the genome, and deleterious recessive mutations present as  
621 genetic load in genome segments derived from outcrossing *G. rivale* will be exposed (Hu 2015). Given

622 our ability readily to artificially cross the *Geum* species, and produce large numbers of later  
623 generation hybrids, there is now the potential experimentally to test the hypothesis that strong  
624 ecological selection maintains species integrity using appropriate field experiments.  
625

626 **Author contributions**

627 C.Y.J, K.G. and R.A.E. conceived the study; C.Y.J., F.T., M.T. and R.A.E. gathered data; C.Y.J., K.L., F.T.  
628 and R.A.E. analysed data; C.Y. J., K.L. and R.A.E. wrote the manuscript with input and revisions from  
629 all co-authors.

630

631 **Acknowledgements:** This research was funded by BBSRC grant Bb/J006580/1 to RAE. We are very  
632 grateful to Barbara Giles, Cecile Bacles, Olivier Lepais, Hjörtur Þorbjörnsson, and Jorge Paiva who  
633 provided non-UK samples for this project. Beate Nürnberger and Alex Tywford provided comments  
634 that improved this paper.

635 **Data accessibility**

636 DNA sequences: will be made available on European Nucleotide Archive before publication

637 Assembled genome: will be made available (University of Edinburgh link) before publication

638 Morphological data: will be made available on Dryad before publication

639 Scripts: will be made available on github.com before publication

640

641 **Conflict of interest:** None declared.

642

643 **REFERENCES**

- 644 Abbott RJ, Barton NH, Good JM (2016) Genomics of hybridisation and its evolutionary consequences.  
645 *Molecular Ecology*, **25**, 2325-2332.
- 646 Arnold B, Corbett-Detig RB, Hartl D, Bomblies K. (2013) RADseq underestimates diversity and  
647 introduces genealogical biases due to nonrandom haplotype sampling. *Molecular ecology*, **22**, 3179-  
648 3190.
- 649 Aeschbacher S, Selby JP, Willis JH, Coop, G (2016) Population-genomic inference of the strength and  
650 timing of selection against gene flow. doi: <https://doi.org/10.1101/072736>.
- 651 Arens P, Durka W, Wernke-Lenting JH, Smulders MJM (2004) Isolation and characterization of  
652 microsatellite loci in *Geum urbanum* (Rosaceae) and their transferability within the genus *Geum*.  
653 *Molecular Ecology Notes*, **4**, 209–212.
- 654 Arunkumar R, Ness RW, Wright SI, Barrett SCH (2015) The evolution of selfing is accompanied by  
655 reduced efficacy of selection and purging of deleterious mutations. *Genetics*, **199**, 817-29.
- 656 Barrett SCH, R. Arunkumar, R, Wright SI (2014) The demography and population genomics of  
657 evolutionary transitions to self-fertilization in plants. *Philosophical Transactions of the Royal Society*  
658 *B*, **369**, 2013034.
- 659 Brandvain Y, Slotte T, Hazzori KM, Wright SI, Coop G (2013) Genomic identification of founding  
660 haplotypes reveals the history of the selfing species *Capsella rubella*. *PLoS Genetics*, **9**, e1003754.
- 661 Brandvain Y, Kenney AM, Fligel L, Coop G, Sweigart AL (2014) Speciation and introgression between  
662 *Mimulus nasutus* and *Mimulus guttatus*. *PLoS Genetics*, **10**, e1004410.
- 663 Briscoe Runquist RD, Chu E, Iverson JL, Kopp JC, Moeller DA (2014) Rapid evolution of reproductive  
664 isolation between incipient outcrossing and selfing *Clarkia* species. *Evolution*, **68**, 2885-2900.
- 665 Brys R, Vanden Broeck A, Mergeay J, Jacquemyn H (2014) The contribution of mating system  
666 variation to reproductive isolation in two closely related *Centaureum* species (Gentianaceae) with a  
667 generalized flower morphology. *Evolution*, **68**, 1281–1293.
- 668 Catchen JM, Hohenlohe PA, Bassham S, Amores A, Cresko WA (2013) Stacks: an analysis tool set for  
669 population genomics. *Molecular Ecology*, **22**, 3124-3140
- 670 Catchen JM, Amores A, Hohenlohe P, Cresko W, Postlethwait JH (2011) Stacks: building and  
671 genotyping loci *de novo* from short-read sequences. *G3: Genes, Genomes, Genetics*, **1**, 171-182.
- 672 Carney SE, Gardner KA, Rieseberg LH (2000) Evolutionary changes over the fifty-year history of a  
673 hybrid population of sunflowers (*Helianthus*). *Evolution*, **54**, 462–474.
- 674 Charlesworth D (2003) Effects of inbreeding on the genetic diversity of populations. *Philosophical*  
675 *Transactions of the Royal Society B*, **358**, 1051–1070.
- 676 Charlesworth D, Morgan MT, Charlesworth B (1993) Mutation accumulation in finite outbreeding and  
677 inbreeding populations. *Genetics Research*, **61**, 39-56.
- 678 Charlesworth D, Wright SI (2001) Breeding systems and genome evolution. *Current Opinion in*  
679 *Genetics & Development*, **11**, 685-690.
- 680
- 681 Chen H (2012) The joint allele frequency spectrum of multiple populations: A coalescent theory  
682 approach. *Theoretical Population Biology*, **81**, 179-195.

- 683  
684 Christe C, Stolting KN, Bresadola L, Fussi B, Heinze B, Wegmann D, Lexer C (2016) Selection against  
685 recombinant hybrids maintains reproductive isolation in hybridizing *Populus* species despite F1  
686 fertility and recurrent gene flow. *Molecular Ecology*, **25**, 2482-2498.  
687
- 688 Cruickshank TE, Hahn MW (2014) Reanalysis suggests that genomic islands of speciation are due to  
689 reduced diversity, not reduced gene flow. *Molecular Ecology*, **23**: 3133-3157.
- 690 Coyne JA, Orr HA (1989). Patterns of speciation in *Drosophila*. *Evolution*, **43**, 362-381.  
691
- 692 Coyne JA, Orr HA (1997) "Patterns of speciation in *Drosophila*" revisited. *Evolution*, **51**, pp.295-303.  
693
- 694 Coyne JA, Orr H A (2004) *Speciation*. Sinauer Associates, Sunderland, Massachusetts.
- 695 Doyle JJ, Doyle JL (1990) Isolation of plant DNA from fresh tissue. *Focus*, **12**, 13–15.
- 696 Ducarme V, Vrancken J, Wesselingh RA (2010) Hybridization in annual plants: patterns and dynamics  
697 during a four-year study in mixed *Rhinanthus* populations. *Folia Geobotanica*, **45**, 387-405.
- 698 Ewing GB, Jensen JB (2016) The consequences of not accounting for background selection in  
699 demographic inference. *Molecular Ecology*, **25**, 135-141.
- 700 Fishman L, Wyatt R (1999) Pollinator-mediated competition, reproductive character displacement,  
701 and the evolution of selfing in *Arenaria uniflora* (Caryophyllaceae). *Evolution*, **53**, 1723-1733.
- 702 Glémin S, Ronfort J (2013) Adaptation and maladaptation in selfing and outcrossing species: New  
703 mutations versus standing variation. *Evolution*, **67**, 225-240.
- 704 Hohenlohe PA, Bassham S, Etter PD, Stiffler N, Johnson EA, Cresko WA (2010). Population genomics  
705 of parallel adaptation in threespine stickleback using sequenced RAD tags. *PLoS Genetics*, **6**,  
706 e1000862.
- 707 Hu X-S (2015) Mating system as a barrier to gene flow. *Evolution*, **69**, 1158-1177.
- 708 Igic B, Bohs L, Kohn JR (2006) Ancient polymorphism reveals unidirectional breeding system shifts.  
709 *Proceedings of the National Academy of Sciences*, **103**, 1359-1363.  
710
- 711 Kenny AM, Sweigart AL (2016) Reproductive isolation and introgression between sympatric *Mimulus*  
712 species. *Molecular Ecology*, **25**, 2499–2517  
713
- 714 Kyhos DW, Clark C, Thompson WC (1981) The hybrid nature of *Encelia laciniata* (Compositae:  
715 *Heliantheae*) and control of population composition by post-dispersal selection. *Systematic Botany*,  
716 **6**, 399–411.  
717
- 718 Li H, Durbin R (2009) Fast and accurate short read alignment with Burrows-Wheeler Transform.  
719 *Bioinformatics*, **25**, 1754-60.
- 720 Li H, Handsaker B, Wysoker A, Fennell T, Ruan J, Homer N, Marth G, Abecasis G, Durbin R, 1000  
721 Genome Project Data Processing Subgroup (2009) The Sequence alignment/map (SAM) format and  
722 SAMtools. *Bioinformatics*, **25**, 2078-2079.
- 723 Lohse K, Chmelik M, Martin SH, Barton NH (2016) Efficient strategies for calculating blockwise  
724 likelihoods under the coalescent. *Genetics*, **202**, 775-786.  
725



- 726 Martin NH, Willis JH (2007) Ecological divergence associated with mating system causes nearly  
727 complete reproductive isolation between sympatric *Mimulus* species. *Evolution*, **61**, 68–82.
- 728 Milne, R.I., Terzioglu, S. & Abbott, R. J. (2003). A hybrid zone dominated by fertile F1s: maintenance  
729 of species barriers in *Rhododendron*. *Molecular Ecology*, **12**, 2719-2729.
- 730 Nason JD, Ellstrand NC, Arnold ML (1992) Patterns of hybridization and introgression in populations  
731 of oaks, manzanitas, and irises. *American Journal of Botany*, **79**, 101-111.
- 732 Nei M, Li WH (1979) Mathematical model for studying genetic variation in terms of restriction  
733 endonucleases. *Proceedings of the National Academy of Sciences*, **76**, 5269-5273.
- 734 Nosil P, Harmon LJ, Seehausen O (2009) Ecological explanations for (incomplete) speciation. *Trends in  
735 Ecology & Evolution*, **24**, 145-156.
- 736 Nürnberger B, Lohse K, Fijarczyk A, Szymura JM, Blaxter ML (2016) Para-allopatry in hybridising fire-  
737 bellied toads (*Bombina bombina* and *B. variegata*): Inference from transcriptome-wide coalescence  
738 analyses. *Evolution*, **70**, 1803-1818.
- 739
- 740 Ossowski S, Schneeberger K, Lucas-Lledó JI, Warthmann N, Clark RM, Shaw, RG, Weigel D, Lynch, M  
741 (2010) The rate and molecular spectrum of spontaneous mutations in *Arabidopsis thaliana*. *Science*,  
742 **327**, 92-94.
- 743 Paoletti M, Buck KW, Brasier CM (2006) Selective acquisition of novel mating type and vegetative  
744 incompatibility genes via interspecies gene transfer in the globally invading eukaryote *Ophiostoma  
745 novo-ulmi*. *Molecular Ecology*, **15**, 249–262.
- 746 Parra G, Bradnam K, Korf I (2007) CEGMA: a pipeline to accurately annotate core genes in eukaryotic  
747 genomes. *Bioinformatics*, **23**, 1061–1067.
- 748 Peterson BK, Weber JN, Kay EH, Fisher HS, Hoekstra HE (2012) Double digest RADseq: an inexpensive  
749 method for *de novo* SNP discovery and genotyping in model and non-model species. *PloS one*, **7**,  
750 e37135.
- 751 Pettergill JB, Moeller DA (2012) Phylogeography of speciation: allopatric divergence and secondary  
752 contact between outcrossing and selfing *Clarkia*. *Molecular Ecology*, **21**, 4578-4592.
- 753 Preston CD, Pearman DA, Dines TD (2002) *New Atlas of the British and Irish flora*. Oxford University  
754 Press, Oxford.
- 755 Raj A, Stephens M, Pritchard JK (2014) fastSTRUCTURE: variational inference of population structure  
756 in large SNP data sets. *Genetics*, **197**, 573-589.
- 757 Ruhsam M, Hollingsworth PM, Squirrell J, Ennos RA (2010) Significant differences in outcrossing rate,  
758 self-incompatibility, and inbreeding depression between two widely hybridizing species of *Geum*.  
759 *Biological Journal of the Linnean Society*, **101**, 977–990.
- 760 Ruhsam M, Hollingsworth PM, Ennos RA (2011) Early evolution in a hybrid swarm between  
761 outcrossing and selfing lineages in *Geum*. *Heredity*, **107**, 246–255.
- 762 Ruhsam M, Hollingsworth PM, Ennos RA (2013). Patterns of mating, generation of diversity, and  
763 fitness of offspring in a *Geum* hybrid swarm. *Evolution*, **67**, 2728–2740.
- 764 Sicard A, Lenhard M (2011) The selfing syndrome: a model for studying the genetic and evolutionary  
765 basis of morphological adaptation in plants. *Annals of Botany*, **107**, 1433-1443.

- 766 Smedmark JE, Eriksson T, Evans RC, C.S. Campbell CS (2003) Ancient allopolyploid speciation in  
767 Geinae (*Rosaceae*): evidence from nuclear granule-bound starch synthase (GBSSI) gene sequences.  
768 *Systematic Biology*, **52**, 374-385.
- 769 Stebbins GL (1957) Self-fertilization and population variability in the higher plants. *American*  
770 *Naturalist*, **91**, 337-354.
- 771 Tang C, Toomajian C, Sherman-Broyles S, Plagnol V, Guo Y-L, Hu TT, Clark RM, Nasrallah JB, Weigel D,  
772 Nordborg M (2007). The evolution of selfing in *Arabidopsis thaliana*. *Science*, **317**, 1070-1072.
- 773 Taylor K (1997a) Biological flora of the British Isles: *Geum rivale*. *Journal of Ecology*, **85**, 721–731.
- 774 Taylor K (1997b) Biological flora of the British Isles: *Geum urbanum*. *Journal of Ecology*, **85**, 705–720.
- 775 Twyford AD, Kidner CA, Ennos RA (2015) Maintenance of species boundaries in a Neotropical  
776 radiation of *Begonia*. *Molecular Ecology*, **24**, 4982-4993.
- 777 Vandepitte K, Jacquemyn H, Roldan-Ruiz, I, Honnay O (2007) Landscape genetics of the self-  
778 compatible forest herb *Geum urbanum*: effects of habitat age, fragmentation and local environment.  
779 *Molecular Ecology*, **16**, 4171-4179.
- 780 Vickery RK Jr (1978) Case studies in the evolution of species complexes in *Mimulus*. *Evolutionary*  
781 *Biology*, **11**, 405–507.
- 782 Waldren S, Etherington JR, Davies MS (1988) Comparative studies of plant growth and distribution in  
783 relation to waterlogging XV. The effect of waterlogging on growth of various populations of and  
784 hybrids between *Geum rivale* L. and *Geum urbanum* L. *New Phytologist*, **109**, 97 – 106.
- 785 Waldren S, Etherington JR, Davies MS. (1989) Hybridization and ecology of *Geum rivale* L and *Geum*  
786 *urbanum* L (*Rosaceae*) at Malham Tarn, Yorkshire. *Botanical Journal of the Linnean Society*, **101**, 199–  
787 211.
- 788 Wright SI, Ness RW, Foxe JP, Barrett SCH (2008) Genomic consequences of outcrossing and selfing in  
789 plants. *International Journal of Plant Sciences*, **169**, 105-118.
- 790 Wu TD, Watanabe CK (2005) Gmap: a genomic mapping and alignment program for mRNA and EST  
791 sequences. *Bioinformatics*, **21**, 1859–1875
- 792 Wright SI, Kalisz S, Slotte T (2013) Evolutionary consequences of self-fertilization in plants.  
793 *Proceedings of the Royal Society B*, **280**, 20130133.
- 794 Zhou H-F, Zheng X-M, Wei R-X, Second G, Vaughan DA, Ge S (2008). Contrasting population genetic  
795 structure and gene flow between *Oryza rufipogon* and *Oryza nivara*. *Theoretical and Applied*  
796 *Genetics*, **117**, 1181–1189.
- 797 Zohren J, Wang N, Kardailsky I, Borrell JS, Joecker A, Nichols RA, Buggs RJA (2016) Diploid–tetraploid  
798 introgression among British birch trees with shifting ranges shown by restriction site-associated  
799 markers. *Molecular Ecology*, **25**, 2413–2426.

801

| Polymorphism Type                                                                                                                    | Count |
|--------------------------------------------------------------------------------------------------------------------------------------|-------|
| Alternately fixed SNPs                                                                                                               | 488   |
| SNP polymorphic in <i>G. rivale</i> but one allele fixed in <i>G. urbanum</i> (e.g., <i>G. rivale</i> : A, T; <i>G. urbanum</i> : T) | 1334  |
| SNP polymorphic in <i>G. urbanum</i> but one allele fixed in <i>G. rivale</i>                                                        | 338   |
| <i>G. rivale</i> and <i>G. urbanum</i> share polymorphism                                                                            | 34    |
| Total SNPs analysed                                                                                                                  | 2194  |

802

803 Table 1: Frequency of polymorphism of different forms within and between *Geum* species. Analysis  
804 allows multiple SNPs per scaffold.

805

806

| Population by species | Number of SNPs           | $F_{IS}$ |
|-----------------------|--------------------------|----------|
| <i>G. rivale</i>      |                          |          |
| Ben Lawers            | 309                      | 0.24     |
| Coire Garblach        | 347                      | 0.26     |
| Ben Lui               | 341                      | 0.24     |
| <i>G. urbanum</i>     |                          |          |
| Priory Wood           | 67                       | 0.98     |
| Mill Wood             | 71                       | 0.08     |
| Burgh Wood            | 76                       | 0.89     |
| Hoades Wood           | 47                       | 0.95     |
| Punnetts Town         | 61                       | 0.85     |
| Frith Wood            | 69                       | 0.96     |
| Stanford Bridge       | 68                       | 0.97     |
| Combe Wood            | 62                       | 0.99     |
| Copperhurst           | 67                       | 0.99     |
| Selwyn Wood           | Only 1 polymorphic locus |          |

807

808 Table 2.  $F_{IS}$  estimates for 'allopatric' UK *G. rivale* and *G. urbanum* populations using data filtered for  
809 paralogs.

810

811

812

| Sample       | div <sub>2</sub> | IM <sub>u→r</sub> | IM <sub>r→u</sub> |
|--------------|------------------|-------------------|-------------------|
| Ben Lui 1    | -12.9            | -12.5             | 0                 |
| Ben Lui 4    | -9.66            | 0                 | -0.721            |
| Ben Lawers 5 | -6.67            | -6.51             | 0                 |

813

814 Table 3. Difference in log Likelihoods between the “best” and alternate models. “Sample” refers to  
815 which *G. rivale* individual is paired with the single *G. urbanum* individual.

816

817

818

|                                      | Model                                                                     |                        |                        |
|--------------------------------------|---------------------------------------------------------------------------|------------------------|------------------------|
|                                      | div <sub>2</sub>                                                          | IM <sub>r→u</sub>      | IM <sub>u→r</sub>      |
| N <sub>anc</sub> = N <sub>rivb</sub> | 1.30 * 10 <sup>5</sup>                                                    | 1.24 * 10 <sup>5</sup> | 1.11 * 10 <sup>5</sup> |
| N <sub>urb</sub>                     | 3.77 * 10 <sup>4</sup>                                                    | 3.09 * 10 <sup>4</sup> | 3.38 * 10 <sup>4</sup> |
| t (years)                            | 2.22 * 10 <sup>6</sup> (2.01 * 10 <sup>6</sup> - 2.43 * 10 <sup>6</sup> ) | 2.35 * 10 <sup>6</sup> | 2.48 * 10 <sup>6</sup> |
| M (mean, 95% CI's)                   |                                                                           | 0.04 (0.005 - 0.191)   | 0.04 (0.007 - 0.101)   |

819

820 Table 4. Parameter estimates under the models for *G. rivale* sample, Ben Lui 4. 95% Confidence  
 821 intervals provided in parentheses. See Table S6 for parameter estimates for all three sample pairs.

822

823

| Sample and classification | % ' <i>rivale</i> ' in genome | Homozygous ' <i>rivale</i> ' allele | Heterozygous | Homozygous ' <i>urbanum</i> ' allele | Total Loci scored |
|---------------------------|-------------------------------|-------------------------------------|--------------|--------------------------------------|-------------------|
| 29A (H)                   | 47.2                          | 9                                   | 166          | 20                                   | 195               |
| 32C (H)                   | 45.3                          | 7                                   | 132          | 22                                   | 161               |
| 26B (BCR)                 | 87.9                          | 138                                 | 28           | 7                                    | 173               |
| 27B (BCR)                 | 70.8                          | 95                                  | 113          | 6                                    | 214               |

824

825 Table 5 Genotypic composition at species-specific ddRAD loci for individuals classified as early  
826 generation hybrids (H) and backcrosses to *G. rivale* (BCR).

827

828

829

830

831

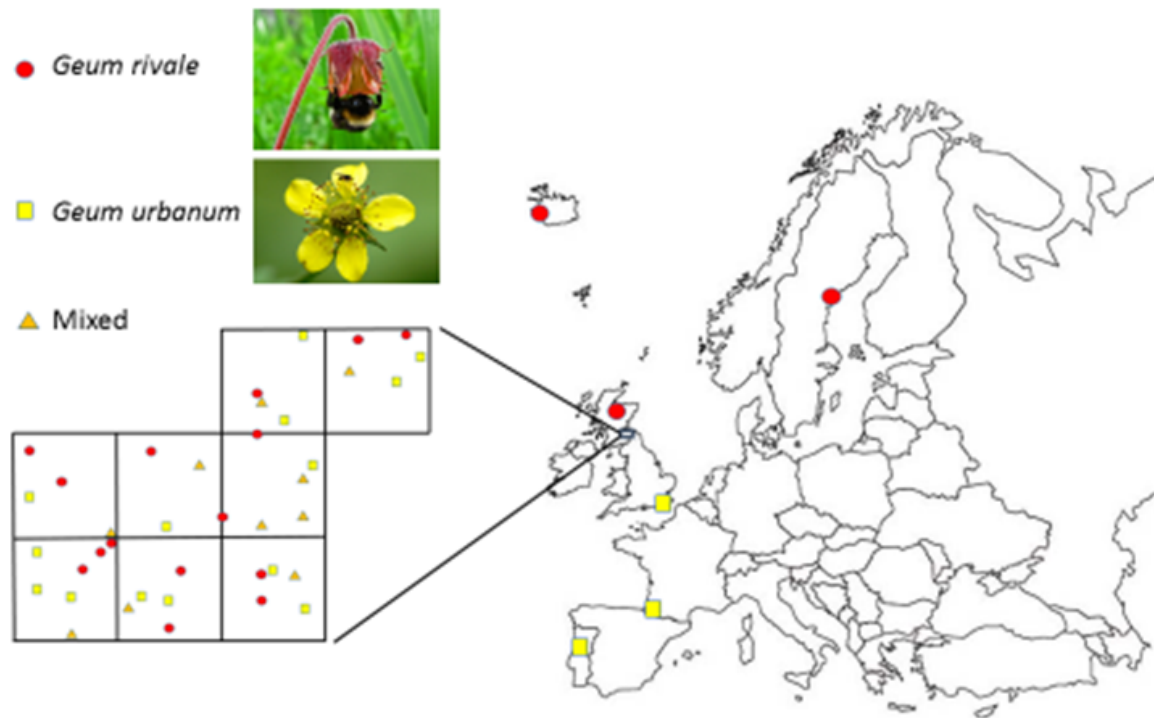

832

833

834 Figure 1. Locations of allopatric populations (large map) of *Geum rivale* and *G. urbanum* and detailed  
835 distribution of 39 sympatric populations in eight 10km x 10km squares (inset).

836



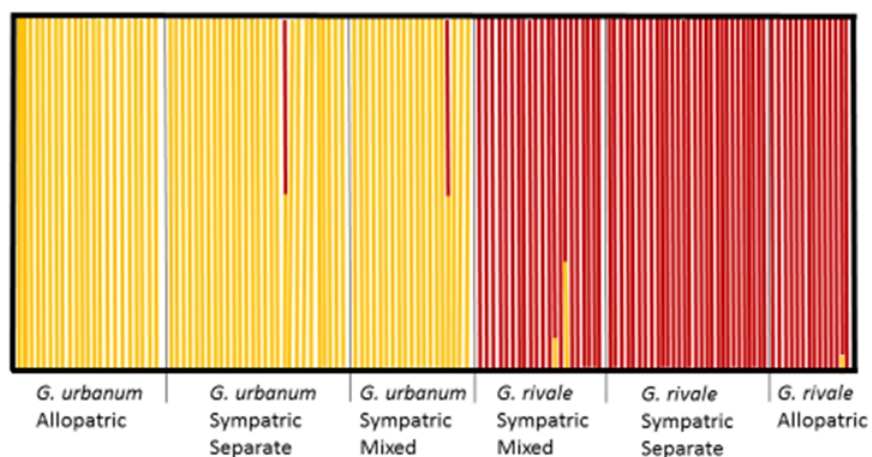

837

838 Figure 2. Results of fastSTRUCTURE (Raj et al. 2014) cluster analysis for K=2 based on 188 SNP loci  
839 present in all 133 *Geum* individuals scored in the allopatric and sympatric populations. Each bar  
840 represents one individual and shows the proportion of the genome from *G. rivale* (red) and *G.*  
841 *urbanum* (yellow).

842

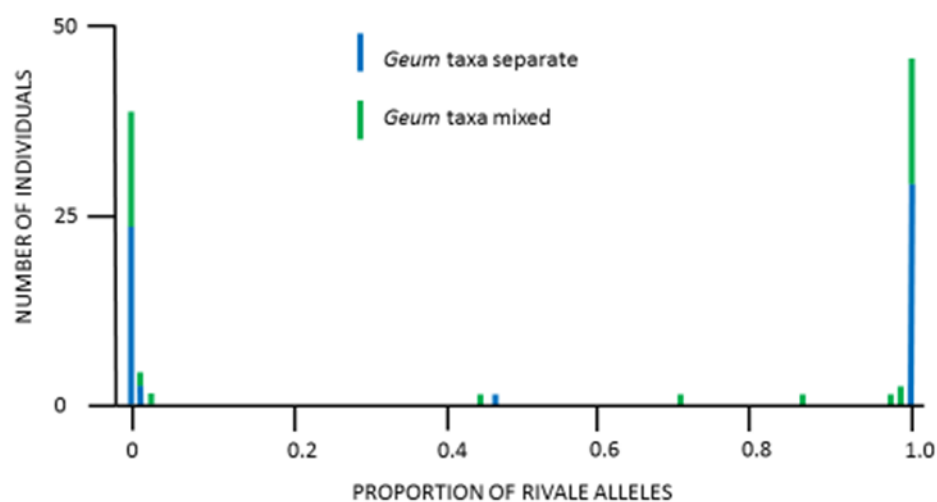

843

844 Figure 3. Distribution of hybrid index (proportion of *G. rivale* species-specific alleles) for 96  
845 individuals within 39 sympatric populations where *G. rivale* and *G. urbanum* were either found alone  
846 (blue bars, 'pure population') or together (green bars, 'mixed population').

847

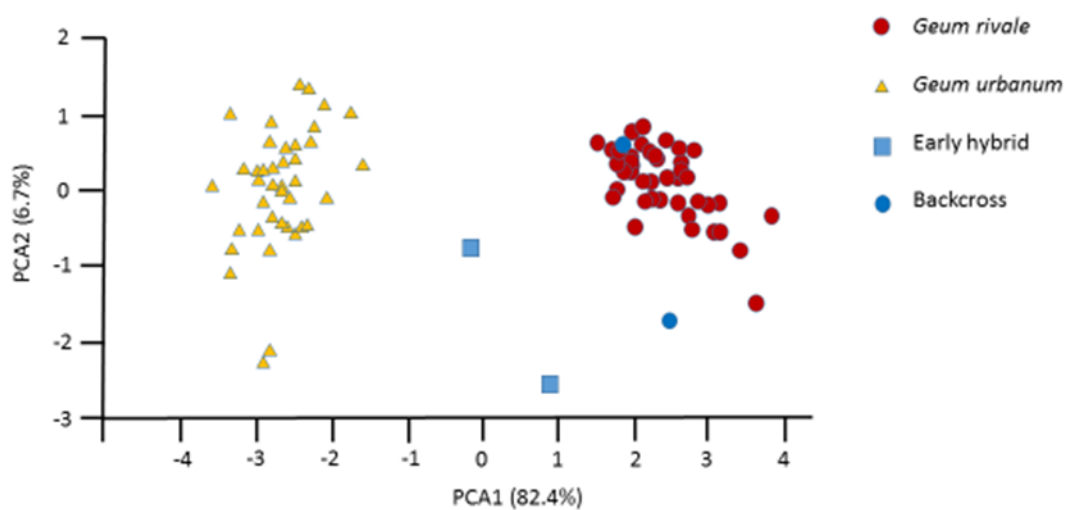

848

849 Figure 4. PCA analysis based on eight morphological characters measured in a common environment  
850 for a sample of 87 individuals of *Geum* sampled from sympatric populations. Genetic class (from  
851 Hybrid Index) of each individual (*G. rivale*, *G. urbanum*, early hybrid, or backcross to *G. rivale*) derived  
852 from an analysis of 215 species-specific markers is shown.

853

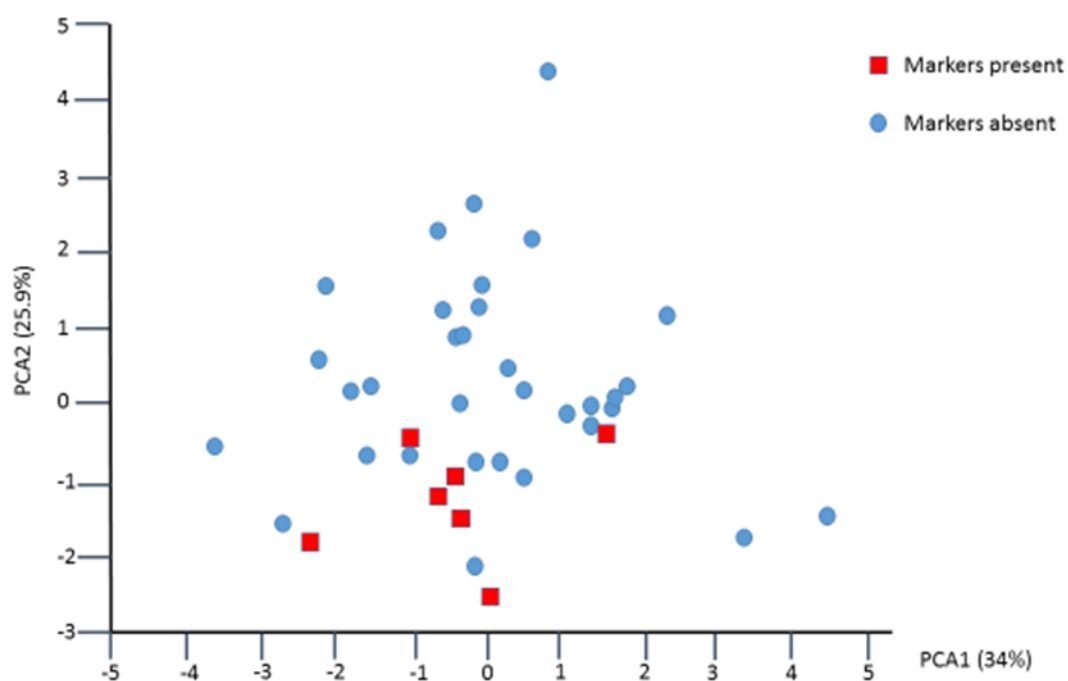

854

855 Figure 5. PCA analysis of 40 individuals of *G. urbanum* sampled from sympatric populations based on  
856 variation for eight morphological characters measured in a common environment. Red, square  
857 individuals jointly possess species-specific SNPs from *G. rivale* at radtags 20454 and 24791.

858

859 **SUPPLEMENTARY MATERIAL**

860 i. Development of Draft Genome for *G. urbanum*

861 Reads were generated from three Illumina libraries: a 151 paired end library with a mean insert size  
862 of 250 (sequenced on Hi seq 2500 (v1 chemistry) to give 144 million read pairs), a 151 paired end  
863 library with a mean insert size of 450 (sequenced on Hi seq to give 134 million read pairs), and a 251  
864 paired end library with a mean insert size of 450 (sequenced on Illumina Mi seq (v2 chemistry) to give  
865 11.9 million read pairs). Illumina adapters were removed and reads quality trimmed using cutadapt  
866 version 1.3 (Marcel, 2011) with the option “-q 30”. Trimmed reads were assembled into contigs and  
867 scaffolds using MaSuRCA version 2.0.3.1; MaSuRCA (Zimin et al., 2013) was run using the command  
868 line options:

869 GRAPH\_KMER\_SIZE=auto, USE\_LINKING\_MATES=1, LIMIT\_JUMP\_COVERAGE = 60, ovlMerSize=30,  
870 cgwErrorRate=0.25, ovlMemory=4GB, KMER\_COUNT\_THRESHOLD = 1, NUM\_THREADS=  
871 64,JF\_SIZE=23000000000, DO\_HOMOPOLYMER\_TRIM=0.

872 ii. Sample Preparation, Library Preparation, and PCR Amplification for ddRAD

873 For each individual sample, 35ul of genomic DNA (250ug) was digested in a total volume of 50 ul,  
874 comprising 1.0 ul SphI-HF (20u), 1.0 ul EcoRI-HF (20u), 5.0 ul 10x Cutsmart buffer (New England  
875 Biolabs, UK) and 8.0 ul dH2O for a total of 3 hours, at 37°C. The reaction was purified by the addition  
876 of Ampure XP beads at a ratio 1.8 x beads: 1x DNA rather than by heat denaturation, to maintain the  
877 integrity of the EcoRI generated overhangs.

878 Samples were eluted in 25ul EB (Qiagen). Unique barcoded EcoRI P1 adapters (Peterson et al. 2012)  
879 and a generic SphI P2 adapter (Table S3) were ligated to the complementary overhangs of the DNA  
880 fragments generated by the EcoRI:SphI double digest reaction. Each ligation reaction was carried out  
881 in a total volume of 40ul, consisting of 25ul DNA, 2.0 ul P1 adapter (4uM), 2.0 ul P2 adapter (4uM),  
882 4.0 ul 10x T4 Ligase buffer (New England Biolabs, UK) 1ul Quick Ligase (New England Biolabs, UK), and  
883 the reaction was incubated at 23°C for 30 min followed by heat denaturation at 65 °C for 15 min.

884 After ligation the reactions were pooled into libraries containing a maximum of 24 samples, each  
885 barcoded with a unique EcoRI PI adapter sequence. The pooled libraries were then subjected to two  
886 rounds of Ampure XP bead clean up, at a ratio of 1x Ampure XP beads: 1 x DNA and eluted in a  
887 volume of 30ul EB (Qiagen). Individual libraries were size selected by BluePippin Size selection  
888 system, 2% Precast Agarose gel cassette (sage science) using the ‘Tight’ collection mode set to a  
889 target size of 300bp. The success of size selection was assessed by Bioanalyzer DNA HS chip (Agilent  
890 Technologies).

891 For each ddRAD library, PCR amplification was carried out in 2 independent 50 µL reactions  
892 consisting of 20 ul size selected DNA, 25ul 2x Phusion Master Mix (New England Biolabs, UK), 2.5 ul  
893 DMSO, and 1ul ddRAD P1 PCR primer (10 nm), and a barcoded P2 primer (10 nm) that introduced a  
894 8bp unique index during amplification (Table S3), using the following cycling parameters: 98 °C for 30  
895 s followed by 12 cycles of 98 °C for 10 s and 72 °C for 60 s.

896 PCR products were then pooled, and purified by Ampure XP beads at a ratio of 0.8 x beads: 1x DNA,  
897 and the mean insert size of the individual libraries was assessed by Bioanalyzer DNA HS chip, (Agilent  
898 Technologies), and were quantified by qPCR on an Illumina Eco instrument using the Kapa Library  
899 Quantification Kit. A final super pool was created consisting of equimolar individual library PCR  
900 reactions and the quantification of the pool was measured by qPCR.

901

902 References

903 Marcel M (2012). Cutadapt removes adapter sequences from high-throughput sequencing reads.  
904 *Bioinformatics in Action*, **17**, 10-12.

905 Peterson BK, Weber JN, Kay EH, Fisher HS, Hoekstra HE (2012) Double digest RADseq: an inexpensive  
906 method for *de novo* SNP discovery and genotyping in model and non-model species. *PloS one*, **7**,  
907 e37135.

908 Zimin AV, Marçais G, Puiu D, Roberts M, Salzberg SL, Yorke JA (2013)The MaSuRCA genome  
909 assembler. *Bioinformatics*, **29**, 2669-2677.

910

911

912

913

914

915

916 SUPPLEMENTARY TABLES

917

| Site                | Coordinates                   | Taxon |
|---------------------|-------------------------------|-------|
| Ben Lawers, UK      | 56°32'23.46"N/ 004°17'27.58"W | R (4) |
| Coire Garblach, UK  | 57°01'38.29"N/ 003°50'08.17"W | R (4) |
| Ben Lui, UK         | 56°23'38.87"N/ 004°49'28.02"W | R (4) |
| Iceland             | 64°07'N / 21°50'W             | R (1) |
| Sweden              | 63°17'27.00"N/ 18°42'54.00"E  | R (1) |
| Selwyn Wood, UK     | 50°57'43.96"N/ 000°12'40.52"E | U (2) |
| Combe Wood, UK      | 51°02'05.03"N/ 000°18'31.39"E | U (2) |
| Burgh Wood, UK      | 51°01'21.30"N/ 000°27'13.26"E | U (2) |
| Hoads Wood, UK      | 51°08'47.89"N/ 000°47'27.02"E | U (2) |
| Stanford Bridge, UK | 51°09'00.56"N/ 000°45'33.55"E | U (2) |
| Frith Wood, UK      | 51°10'22.20"N/ 000°42'59.47"E | U (2) |
| Priory Wood, UK     | 51°05'07.33"N/ 000°54'02.91"E | U (2) |
| Copperhurst, UK     | 51°04'55.62"N/ 000°56'53.11"E | U (2) |
| Mill Wood, UK       | 50°58'47.12"N/ 000°24'56.60"E | U (2) |
| Punnets Town, UK    | 50°58'20.12"N/ 000°18'43.66"E | U (2) |
| Portugal            | 40°22'43.00"N/ 008°22'11.00"E | U (1) |
| France              | 43°16'59.57"N/ 001°28'56.59"E | U (1) |

918

919 Table S1. Sampling locations for allopatric populations of *Geum rivale* (R) and *G. urbanum* (U).

920 Numbers in brackets = sample size.

921

| Site Number | Elevation(m) | Coordinates                   | Taxa          |
|-------------|--------------|-------------------------------|---------------|
| 1           | 331          | 55°49'26.54"N/ 002°46'46.78"W | R (2)         |
| 2           | 271          | 55°46'34.73"N/ 002°47'05.62"W | U (2)         |
| 3           | 360          | 55°47'24.57"N/ 002°43'31.04"W | R (2)         |
| 4           | 300          | 55°42'00.02"N/ 002°45'29.21"W | U (2)         |
| 5           | 232          | 55°44'28.64"N/ 002°38'33.57"W | R (2)         |
| 6           | 180          | 55°39'10.43"N/ 002°41'50.99"W | R (2) + U (2) |
| 7           | 100          | 55°41'36.40"N/ 002°42'32.59"W | U (2)         |
| 8           | 200          | 55°43'09.71"N/ 002°41'37.32"W | R (2)         |
| 9           | 230          | 55°44'09.73"N/ 002°40'25.34"W | R (2)         |
| 10          | 285          | 55°44'42.61"N/ 002°38'33.91"W | R (2) + U (2) |
| 11          | 195          | 55°43'59.74"N/ 002°46'10.80"W | U (2)         |
| 12          | 230          | 55°45'01.53"N/ 002°33'59.10"W | U (2)         |
| 13          | 207          | 55°45'32.21"N/ 002°28'43.98"W | R (2)         |
| 14          | 300          | 55°48'48.07"N/ 002°35'30.28"W | R (2)         |
| 15          | 208          | 55°48'23.28"N/ 002°30'06.09"W | R (2) + U (2) |
| 16          | 225          | 55°40'44.39"N/ 002°37'27.14"W | R (2) + U (2) |
| 17          | 140          | 55°39'59.73"N/ 002°33'15.31"W | R (2)         |
| 18          | 175          | 55°41'09.26"N/ 002°33'42.29"W | U (2)         |
| 19          | 180          | 55°42'51.82"N/ 002°32'54.37"W | R (2)         |
| 20          | 190          | 55°42'05.55"N/ 002°35'57.70"W | U (2)         |
| 21          | 247          | 55°52'05.45"N/ 002°25'54.64"W | R (2)         |
| 22          | 213          | 55°49'57.38"N/ 002°26'06.32"W | R (2)         |
| 23          | 180          | 55°50'21.93"N/ 002°22'53.91"W | U (2)         |
| 24          | 236          | 55°51'59.51"N/ 002°25'42.03"W | R (2) + U (2) |
| 25          | 120          | 55°55'13.74"N/ 002°20'45.68"W | U (2)         |
| 26          | 180          | 55°45'10.70"N/ 002°24'30.61"W | R (2) + U(2)  |
| 27          | 100          | 55°45'38.64"N/ 002°21'06.79"W | R (2) + U (2) |
| 28          | 150          | 55°47'19.70"N/ 002°21'12.24"W | R (2) + U (2) |
| 29          | 90           | 55°48'12.97"N/ 002°20'30.05"W | U (2)         |



|    |     |                               |               |
|----|-----|-------------------------------|---------------|
| 30 | 135 | 55°41'34.10"N/ 002°25'04.03"W | R (2)         |
| 31 | 140 | 55°42'46.67"N/ 002°23'30.15"W | U (2)         |
| 32 | 100 | 55°42'41.00"N/ 002°21'59.39"W | R (2) + U (2) |
| 33 | 60  | 55°40'58.23"N/ 002°21'03.75"W | U (2)         |
| 34 | 130 | 55°42'46.72"N/ 002°25'01.36"W | R (2)         |
| 35 | 220 | 55°55'03.85"N/ 002°15'55.46"W | R (2)         |
| 36 | 140 | 55°53'14.06"N/ 002°17'24.90"W | R (2) + U (2) |
| 37 | 130 | 55°52'48.31"N/ 002°12'25.08"W | U (2)         |
| 38 | 150 | 55°55'13.92"N/ 002°11'29.87"W | R (2)         |
| 39 | 150 | 55°54'23.37"N/ 002°10'22.08"W | U (2)         |

922

923 Table S2. Sampling locations for pure and mixed populations of *Geum rivale* (R) and *G. rivale* (U)  
924 within an area of geographic sympatry in Scotland. Numbers in brackets = sample size.

925

926 Table S3. EcoRI P1 adapters and generic SphI P2 adapter; P1 and P2 primers used in ddRAD  
 927 amplification

| Oligo ID                 | EcoRI Adapter P1.1_Oligo sequence<br>EcoRI Adapter P1.2_Oligo sequence |
|--------------------------|------------------------------------------------------------------------|
| ACACGACA_EcoRI_P1.Top    | 5'-ACACTCTTTCCTACACGACGCTCTTCCGATCTACACGACA-3'                         |
| ACACGACA_EcoRI_P1.Bottom | 5'-Phos-AATTTGTCGTGTAGATCGGAAGAGCGTCGTGTAGGAAAGAGTGT-3'                |
| ACGTAGCA_EcoRI_P1.Top    | 5'-ACACTCTTTCCTACACGACGCTCTTCCGATCTACGTAGCA-3'                         |
| ACGTAGCA_EcoRI_Bottom    | 5'-Phos-AATTTGCTACGTAGATCGGAAGAGCGTCGTGTAGGAAAGAGTGT-3'                |
| ACTGCTCA_EcoRI_P1.Top    | 5'-ACACTCTTTCCTACACGACGCTCTTCCGATCTACTGCTCA-3'                         |
| ACTGCTCA_EcoRI_P1.Bottom | 5'-Phos-AATTTGAGCAGTAGATCGGAAGAGCGTCGTGTAGGAAAGAGTGT-3'                |
| AGCTGTGA_EcoRI_P1.Top    | 5'-ACACTCTTTCCTACACGACGCTCTTCCGATCTAGCTGTGA-3'                         |
| AGCTGTGA_EcoRI_P1.Bottom | 5'-Phos-AATTTACAGCTAGATCGGAAGAGCGTCGTGTAGGAAAGAGTGT-3'                 |
| AGTCACGA_EcoRI_P1.Top    | 5'-ACACTCTTTCCTACACGACGCTCTTCCGATCTAGTCACGA-3'                         |
| AGTCACGA_EcoRI_P1.Bottom | 5'-Phos-AATTTCTGTACTAGATCGGAAGAGCGTCGTGTAGGAAAGAGTGT-3'                |
| ATATCATA_EcoRI_P1.Top    | 5'-ACACTCTTTCCTACACGACGCTCTTCCGATCTATATCATA-3'                         |
| ATATCATA_EcoRI_P1.Bottom | 5'-Phos-AATTTATGATATAGATCGGAAGAGCGTCGTGTAGGAAAGAGTGT-3'                |
| CACACAGT_EcoRI_P1.Top    | 5'-ACACTCTTTCCTACACGACGCTCTTCCGATCTCACACAGT-3'                         |
| CACACAGT_EcoRI_P1.Bottom | 5'-Phos-AATTACTGTGTGAGATCGGAAGAGCGTCGTGTAGGAAAGAGTGT-3'                |
| CATGATCA_EcoRI_P1.Top    | 5'-ACACTCTTTCCTACACGACGCTCTTCCGATCTCGATACTA-3'                         |
| CATGATCA_EcoRI_P1.Bottom | 5'-Phos-AATTTGATCATGAGATCGGAAGAGCGTCGTGTAGGAAAGAGTGT-3'                |
| CGCGCATA_EcoRI_P1.Top    | 5'-ACACTCTTTCCTACACGACGCTCTTCCGATCTCGCGCATA-3'                         |

928

|                          |                                                           |
|--------------------------|-----------------------------------------------------------|
| CGCGCATA_EcoRI_P1.Bottom | 5'-Phos-AATTTATGCGCGAGATCGGAAGAGCGTCGTGTAGGGAAAAGAGTGT-3' |
| CTAGTGTC_EcoRI_P1.Top    | 5'-ACACTCTTTCCTACACGACGCTCTTCCGATCTCTAGTGTC-3'            |
| CTAGTGTC_EcoRI_P1.Bottom | 5'-Phos-AATTGACACTAGAGATCGGAAGAGCGTCGTGTAGGGAAAAGAGTGT-3' |
| CTCTGCTC_EcoRI_P1.Top    | 5'-ACACTCTTTCCTACACGACGCTCTTCCGATCTCTCTGCTC-3'            |
| CTCTGCTC_EcoRI_P1.Bottom | 5'-Phos-AATTGAGCAGAGAGATCGGAAGAGCGTCGTGTAGGGAAAAGAGTGT-3' |
| CTGATGCT_EcoRI_P1.Top    | 5'-ACACTCTTTCCTACACGACGCTCTTCCGATCTCTGATGCT-3'            |
| CTGATGCT_EcoRI_P1.Bottom | 5'-Phos-AATTAGCATCAGAGATCGGAAGAGCGTCGTGTAGGGAAAAGAGTGT-3' |
| GACTGCAG_EcoRI_P1.Top    | 5'-ACACTCTTTCCTACACGACGCTCTTCCGATCTGACTGCAG-3'            |
| GACTGCAG_EcoRI_P1.Bottom | 5'-Phos-AATTCTGCAGTCAGATCGGAAGAGCGTCGTGTAGGGAAAAGAGTGT-3' |
| GATCGTGA_EcoRI_P1.Top    | 5'-ACACTCTTTCCTACACGACGCTCTTCCGATCTGATCGTGA-3'            |
| GATCGTGA_EcoRI_P1.Bottom | 5'-Phos-AATTTACGATCAGATCGGAAGAGCGTCGTGTAGGGAAAAGAGTGT-3'  |
| GCATGTGC_EcoRI_P1.Top    | 5'-ACACTCTTTCCTACACGACGCTCTTCCGATCTGCATGTGC-3'            |
| GCATGTGC_EcoRI_P1.Bottom | 5'-Phos-AATTGCACATGCAGATCGGAAGAGCGTCGTGTAGGGAAAAGAGTGT-3' |
| GCTACAGC_EcoRI_P1.Top    | 5'-ACACTCTTTCCTACACGACGCTCTTCCGATCTGCTACAGC-3'            |
| GCTACAGC_EcoRI_P1.Bottom | 5'-Phos-AATTGCTGTAGCAGATCGGAAGAGCGTCGTGTAGGGAAAAGAGTGT-3' |
| GTACATCA_EcoRI_P1.Top    | ACACTCTTTCCTACACGACGCTCTTCCGATCTGTACATCA-3'               |
| GTACATCA_EcoRI_P1.Bottom | 5'-Phos-AATTTGATGTACAGATCGGAAGAGCGTCGTGTAGGGAAAAGAGTGT-3' |
| GTGTACTG_EcoRI_P1.Top    | 5'-ACACTCTTTCCTACACGACGCTCTTCCGATCTGTGTACTG-3'            |
| GTGTACTG_EcoRI_P1.Bottom | 5'-Phos-AATTCAGTACACAGATCGGAAGAGCGTCGTGTAGGGAAAAGAGTGT-3' |

|                          |                                                                                    |
|--------------------------|------------------------------------------------------------------------------------|
| TACGATAT_EcoRI_P1.Top    | 5'-ACACTCTTTCCTACACGACGCTCTTCCGATCTTACGATAT                                        |
| TACGATAT_EcoRI_P1.Bottom | 5'-Phos-AATTATATCGTAAAGATCGGAAGAGCGTCGTGTAGGGAAAGAGTGT-3'                          |
| TCAGCATC_EcoRI_P1.Top    | 5'-ACACTCTTTCCTACACGACGCTCTTCCGATCTTCAGCATC-3'                                     |
| TCAGCATC_EcoRI_P1.Bottom | 5'-Phos-AATTGATGCTGAAGATCGGAAGAGCGTCGTGTAGGGAAAGAGTGT-3'                           |
| TCGAGTGA_EcoRI_P1.Top    | 5'-ACACTCTTTCCTACACGACGCTCTTCCGATCTTCGAGTGA-3'                                     |
| TCGAGTGA_EcoRI_P1.Bottom | 5'-Phos-AATTCACTCGAAGATCGGAAGAGCGTCGTGTAGGGAAAGAGTGT-3'                            |
| TCTCTCGA_EcoRI_P1.Top    | 5'-ACACTCTTTCCTACACGACGCTCTTCCGATCTTCTCTCGA-3'                                     |
| TCTCTCGA_EcoRI_P1.Bottom | 5'-Phos-AATTCGAGAGAAGATCGGAAGAGCGTCGTGTAGGGAAAGAGTGT-3'                            |
| TGCACTAC_EcoRI_P1.Top    | 5'-ACACTCTTTCCTACACGACGCTCTTCCGATCTTGCACTAC-3'                                     |
| TGCACTAC_EcoRI_P1.Bottom | 5'-Phos-AATTGTAGTGCAAGATCGGAAGAGCGTCGTGTAGGGAAAGAGTGT-3'                           |
| TGTGACTG_EcoRI_P1.Top    | 5'-ACACTCTTTCCTACACGACGCTCTTCCGATCTTGTGACTG-3'                                     |
| TGTGACTG_EcoRI_P1.Bottom | 5'-Phos-AATTCAGTCACAAGATCGGAAGAGCGTCGTGTAGGGAAAGAGTGT-3'                           |
| <b>Oligo ID</b>          | <b>SphI Adapter P2.1_Oligo sequence</b><br><b>SphI Adapter P2.2_Oligo sequence</b> |
| SphI-P2_Top              | 5'- Phos-AGATCGGAAGAGCGAGAACAA-3'                                                  |
| SphI-P2_Bottom           | 5'-GTGACTGGAGTTCAGACGTGTGCTCTTCCGATCTCATG-3'                                       |

| Oligo ID                 | P1 PCR primer                | P1 PCR primer_Oligo sequence                                       |
|--------------------------|------------------------------|--------------------------------------------------------------------|
| P1 PCR primer            |                              | 5'-AATGATACGGCGACCACCAGATCTACACTCTTTCCCTACACGACGCG-3'              |
| Oligo ID                 | P2 PCR primer_Oligo sequence |                                                                    |
| ddRAD_PCR2_Idx_AACGTGAT  |                              | 5'-CAAGCAGAAGACGGGCATACCGAGATAACGTGTGACTGGAGTTCAGACGTTGTGC-3'      |
| ddRAD_PCR2_Idx_CGCTGATC  |                              | 5'-CAAGCAGAAGACGGGCATACCGAGATCGCTGATCGTGTGACTGGAGTTCAGACGTTGTGC-3' |
| ddRAD_PCR2_Idx_ACAAGCTA  |                              | 5'-CAAGCAGAAGACGGGCATACCGAGATCAAAAGCTA GTGACTGGAGTTCAGACGTTGTGC-3' |
| ddRAD_PCR2_Idx_CTGTAGCC  |                              | 5'-CAAGCAGAAGACGGGCATACCGAGATCTGTAGCCCGTGA CTGGAGTTCAGACGTTGTGC-3' |
| ddRAD_PCR2_Idx_ACGCTCGA  |                              | 5'-CAAGCAGAAGACGGGCATACCGAGATCCGCTCGAGTGA CTGGAGTTCAGACGTTGTGC-3'  |
| ddRAD_PCR2_Idx_ACGTATCA  |                              | 5'-CAAGCAGAAGACGGGCATACCGAGATCACTGACTGAGTTCAGACGTTGTGC-3'          |
| ddRAD_PCR2_Idx_ACTATGCA  |                              | 5'-CAAGCAGAAGACGGGCATACCGAGATCACTATGCACTGAGTTCAGACGTTGTGC-3'       |
| ddRAD_PCR2_Idx_AGAGTCAA  |                              | 5'-CAAGCAGAAGACGGGCATACCGAGATCAAAGTGA CTGGAGTTCAGACGTTGTGC-3'      |
| ddRAD_PCR2_Idx_AGATCGCA  |                              | 5'-CAAGCAGAAGACGGGCATACCGAGATCGCAGTGA CTGGAGTTCAGACGTTGTGC-3'      |
| ddRAD_PCR2_Idx_AGCAGGAA  |                              | 5'-CAAGCAGAAGACGGGCATACCGAGATAGCAGGAA CTGGAGTTCAGACGTTGTGC-3'      |
| ddRAD_PCR2_Idx_AGTCACCTA |                              | 5'-CAAGCAGAAGACGGGCATACCGAGATAGTCACCTA CTGGAGTTCAGACGTTGTGC-3'     |
| ddRAD_PCR2_Idx_ATCCTGTA  |                              | 5'-CAAGCAGAAGACGGGCATACCGAGATATCCTGTA CTGGAGTTCAGACGTTGTGC-3'      |
| ddRAD_PCR2_Idx_ATTGAGGA  |                              | 5'-CAAGCAGAAGACGGGCATACCGAGATATTGAGGA CTGGAGTTCAGACGTTGTGC-3'      |
| ddRAD_PCR2_Idx_CACTTCGA  |                              | 5'-CAAGCAGAAGACGGGCATACCGAGATCCAGTGA CTGGAGTTCAGACGTTGTGC-3'       |
| ddRAD_PCR2_Idx_CAGCGTTA  |                              | 5'-CAAGCAGAAGACGGGCATACCGAGATCAGCGTTA CTGGAGTTCAGACGTTGTGC-3'      |
| ddRAD_PCR2_Idx_CATACCAA  |                              | 5'-CAAGCAGAAGACGGGCATACCGAGATCAACA CTGGAGTTCAGACGTTGTGC-3'         |
| ddRAD_PCR2_Idx_CCAAGTTCA |                              | 5'-CAAGCAGAAGACGGGCATACCGAGATCCAAAGTTCA CTGGAGTTCAGACGTTGTGC-3'    |
| ddRAD_PCR2_Idx_GTGTTCTA  |                              | 5'-CAAGCAGAAGACGGGCATACCGAGATGTGTTCTA CTGGAGTTCAGACGTTGTGC-3'      |
| ddRAD_PCR2_Idx_GCTCGGTA  |                              | 5'-CAAGCAGAAGACGGGCATACCGAGATGCTCGGTA CTGGAGTTCAGACGTTGTGC-3'      |
| ddRAD_PCR2_Idx_GGAGAACA  |                              | 5'-CAAGCAGAAGACGGGCATACCGAGATGGAGA CTGGAGTTCAGACGTTGTGC-3'         |
| ddRAD_PCR2_Idx_GTGTTCTA  |                              | 5'-CAAGCAGAAGACGGGCATACCGAGATGTGTTCTA CTGGAGTTCAGACGTTGTGC-3'      |
| ddRAD_PCR2_Idx_TAGGATGA  |                              | 5'-CAAGCAGAAGACGGGCATACCGAGATGAGGATGA CTGGAGTTCAGACGTTGTGC-3'      |
| ddRAD_PCR2_Idx_TGGCTTCA  |                              | 5'-CAAGCAGAAGACGGGCATACCGAGATTTGGCTTCA CTGGAGTTCAGACGTTGTGC-3'     |
| ddRAD_PCR2_Idx_TTCACGCA  |                              | 5'-CAAGCAGAAGACGGGCATACCGAGATTTTCACGCA CTGGAGTTCAGACGTTGTGC-3'     |
| ddRAD_PCR2_Idx_GCCAAAGAC |                              | 5'-CAAGCAGAAGACGGGCATACCGAGATGCCAAAGAC CTGGAGTTCAGACGTTGTGC-3'     |

931

932

933

|                       | Unfiltered for paralogs |          |
|-----------------------|-------------------------|----------|
| Population by species | Number of SNPs          | $F_{IS}$ |
| <i>G. rivale</i>      |                         |          |
| Ben Lawers            | 2531                    | -0.0082  |
| Coire Garblach        | 2605                    | 0.0384   |
| Ben Lui               | 2664                    | 0.0423   |
| <i>G. urbanum</i>     |                         |          |
| Priory Wood           | 551                     | 0.6216   |
| Mill Wood             | 531                     | -0.0697  |
| Burgh Wood            | 542                     | 0.5913   |
| Hoades Wood           | 451                     | 0.5100   |
| Punnetts Town         | 495                     | 0.4636   |
| Frith Wood            | 507                     | 0.6134   |
| Stanford Bridge       | 535                     | 0.6112   |
| Combe Wood            | 536                     | 0.6110   |
| Copperhurst           | 509                     | 0.5874   |
| Selwyn Wood           | 166                     | -0.4759  |

934

935 Table S4.  $F_{IS}$  estimates for 'allopatric' UK *G. rivale* and *G. urbanum* populations using data not filtered  
936 for paralogs.

937

938

939

940

941

| Sample       | Heterozygosity | No. SNPs private to <i>G. rivale</i> | No. SNPs private to <i>G. urbanum</i> | No. SNPs shared by both species | No. alternately fixed SNPs | No. DNA blocks |
|--------------|----------------|--------------------------------------|---------------------------------------|---------------------------------|----------------------------|----------------|
| Ben Lui 1    |                | 250                                  | 88                                    | 0                               | 1184                       | 668            |
| Ben Lui 4    |                | 299                                  | 86                                    | 1                               | 1170                       | 672            |
| Ben Lawers 5 |                | 179                                  | 88                                    | 0                               | 1189                       | 649            |

942

943 Table S5: Polymorphism counts and numbers of DNA blocks for coalescent analysis for three  
944 individual *G. rivale* samples from UK allopatric populations.

945

|                                      | Model                                                                     |                        |                        |
|--------------------------------------|---------------------------------------------------------------------------|------------------------|------------------------|
|                                      | div <sub>2</sub>                                                          | IM <sub>r→u</sub>      | IM <sub>u→r</sub>      |
| <b>Ben Lui 1</b>                     |                                                                           |                        |                        |
| N <sub>anc</sub> = N <sub>rivb</sub> | 1.03 * 10 <sup>5</sup>                                                    | 1.01 * 10 <sup>5</sup> | 6.42 * 10 <sup>4</sup> |
| N <sub>urb</sub>                     | 3.46 * 10 <sup>4</sup>                                                    | 3.23 * 10 <sup>4</sup> | 3.29 * 10 <sup>4</sup> |
| t (years)                            | 2.36 * 10 <sup>6</sup>                                                    | 2.41 * 10 <sup>6</sup> | 3.03 * 10 <sup>6</sup> |
| M                                    |                                                                           | 0.02 (0.00 – 0.18)     | 0.08 (0.06 – 0.11)     |
| <b>Ben Lui 4</b>                     |                                                                           |                        |                        |
| N <sub>anc</sub> = N <sub>rivb</sub> | 1.30 * 10 <sup>5</sup>                                                    | 1.24 * 10 <sup>5</sup> | 1.11 * 10 <sup>5</sup> |
| N <sub>urb</sub>                     | 3.77 * 10 <sup>4</sup>                                                    | 3.09 * 10 <sup>4</sup> | 3.38 * 10 <sup>4</sup> |
| t (years)                            | 2.22 * 10 <sup>6</sup> (2.01 * 10 <sup>6</sup> – 2.43 * 10 <sup>6</sup> ) | 2.35 * 10 <sup>6</sup> | 2.48 * 10 <sup>6</sup> |
| M (mean, 95% CI's)                   |                                                                           | 0.04 (0.005 - 0.191)   | 0.04 (0.007 - 0.101)   |
| <b>Ben Lawers 5</b>                  |                                                                           |                        |                        |
| N <sub>anc</sub> = N <sub>rivb</sub> | 7.41 * 10 <sup>4</sup>                                                    | 7.34 * 10 <sup>4</sup> | 5.11 * 10 <sup>4</sup> |
| N <sub>urb</sub>                     | 3.54 * 10 <sup>4</sup>                                                    | 3.40 * 10 <sup>4</sup> | 3.38 * 10 <sup>4</sup> |
| t (years)                            | 2.60 * 10 <sup>6</sup>                                                    | 2.64 * 10 <sup>6</sup> | 3.10 * 10 <sup>6</sup> |
| M (mean, 95% CI's)                   |                                                                           | 0.01 (0.00 – 0.103)    | 0.02 (0.002 - 0.052)   |

946

947 Table S6 Parameter estimates under models analysed for sample pairs involving the samples: Ben Lui  
 948 1, Ben Lui 4, and Ben Lawers 5. 95% Confidence intervals provided in parentheses. See Figure S4 for  
 949 plots of 95% CI's.

950

951



952 SUPPLEMENTARY FIGURES

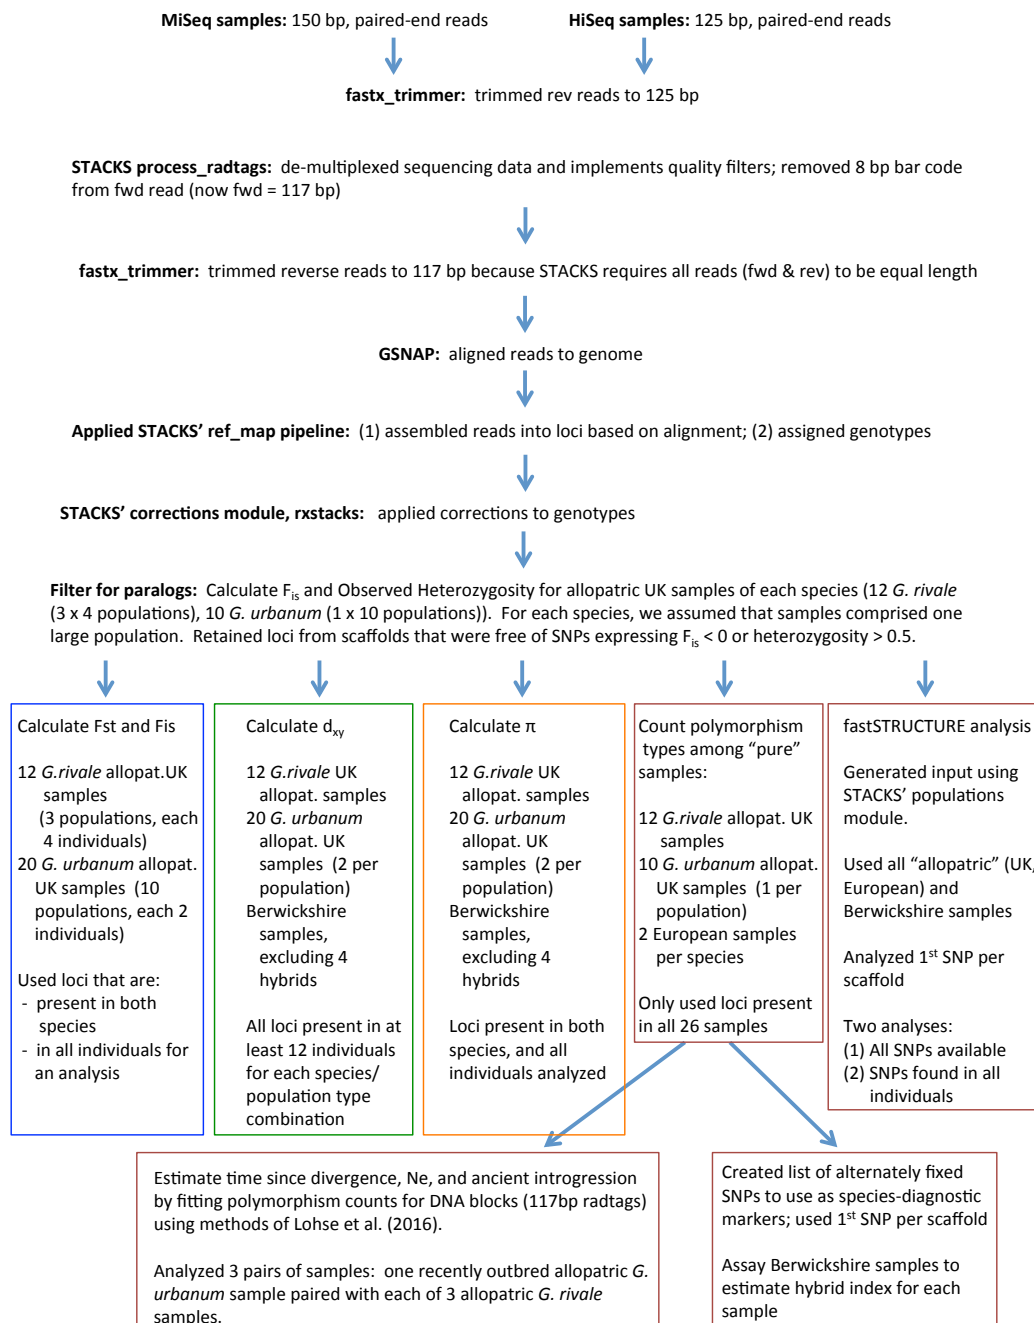

953

954 Figure S1: Bioinformatics pipeline for analysis of *Geum* ddRAD sequences.

### Histogram of %bases variant per scaffold

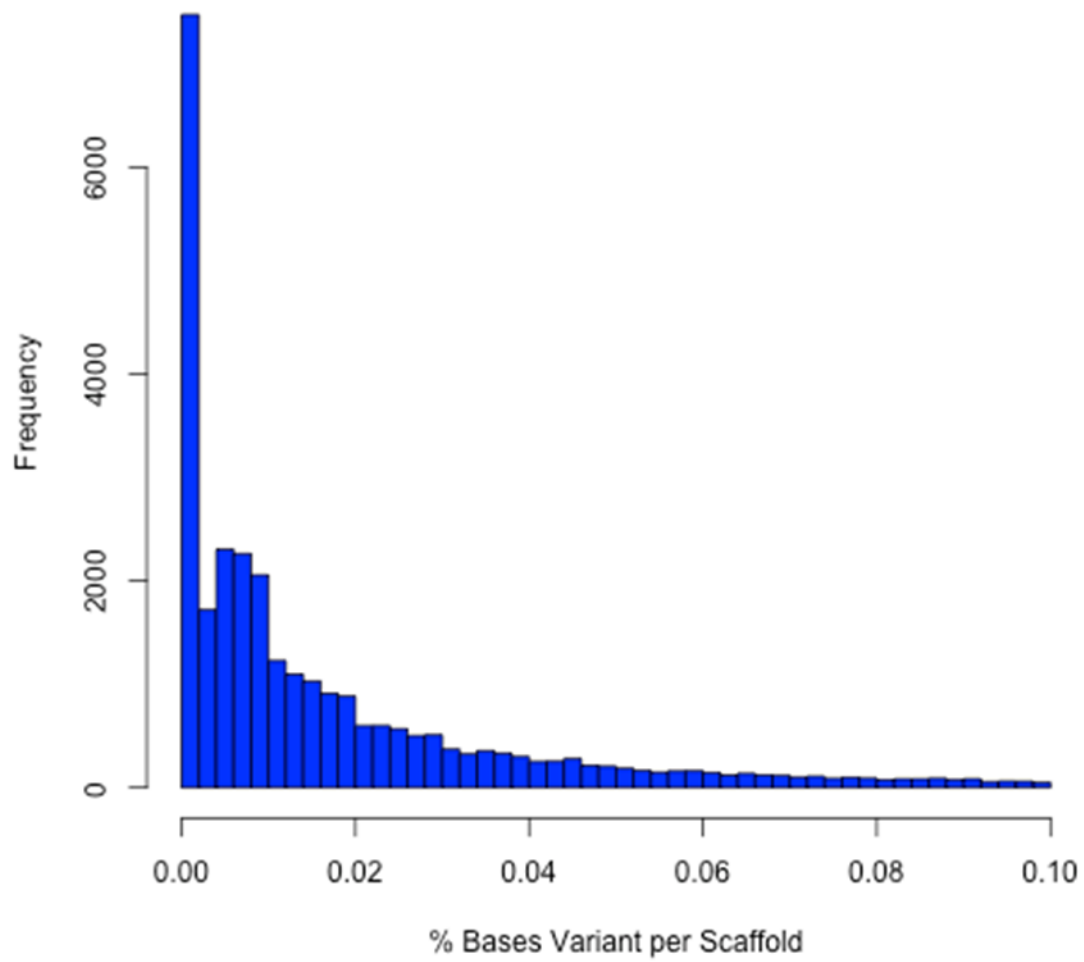

955

956 Figure S2.

957

958

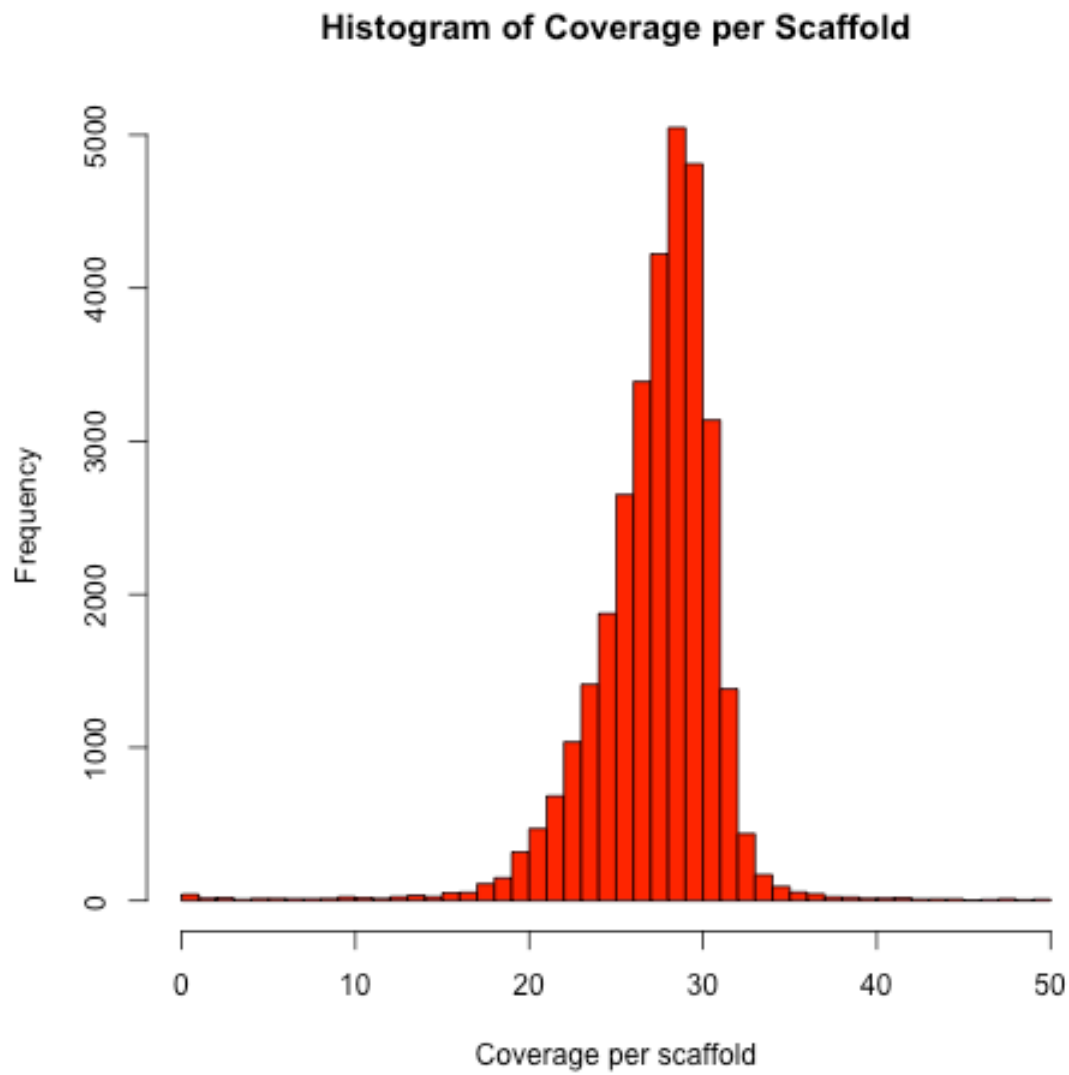

959

960 Figure S3

961

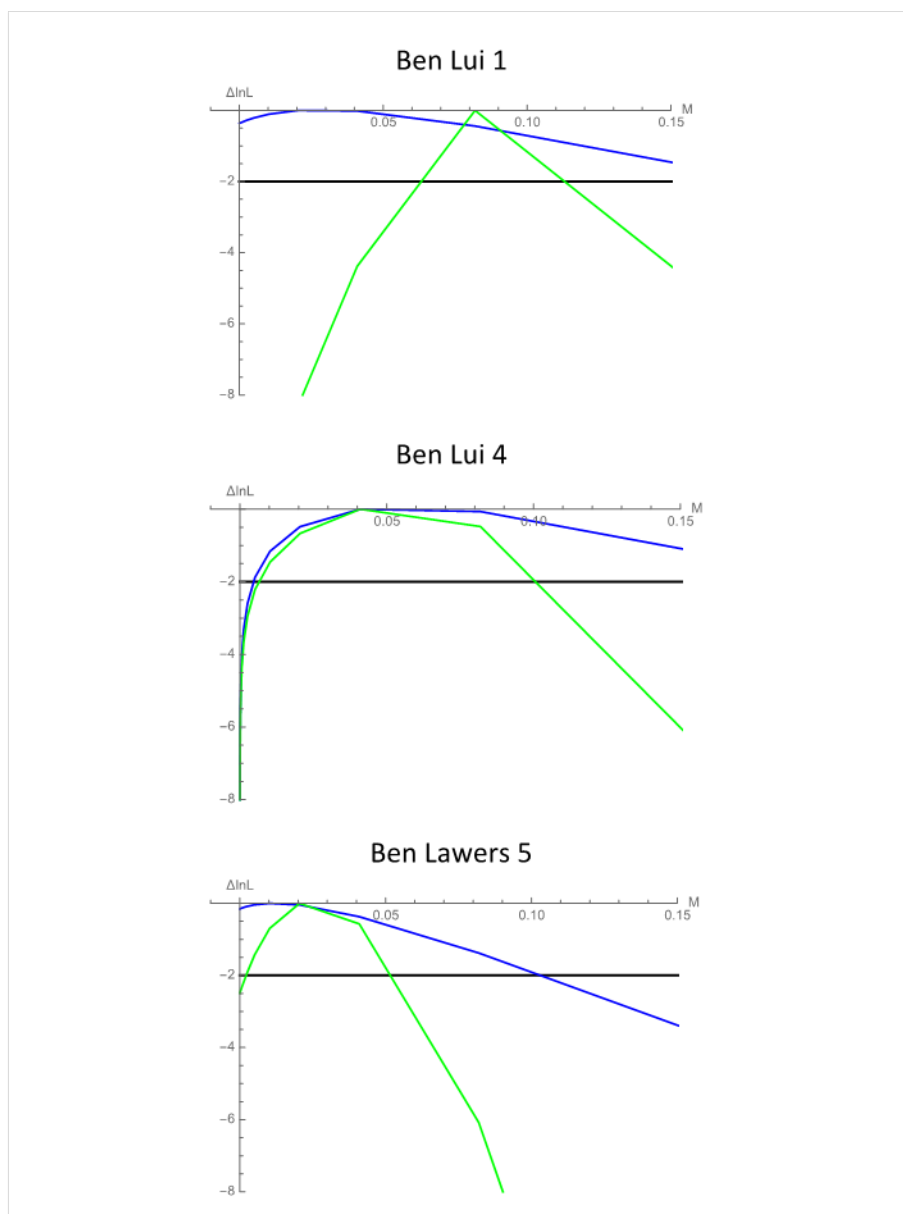

962

963 Figure S4: Log-Likelihood plots for estimates of  $M$  for three pairs of *Geum* samples, each involving a  
964 different *G. rivale* individual (Ben Lui 1, Ben Lui 4, Ben Lawers 5). Blue and green lines represent log-  
965 likelihoods of  $M$  for models  $IM_{r \rightarrow u}$  and  $IM_{u \rightarrow r}$ , respectively. 95% CI's are bounded where these lines  
966 intersect the dark horizontal line.

967

968

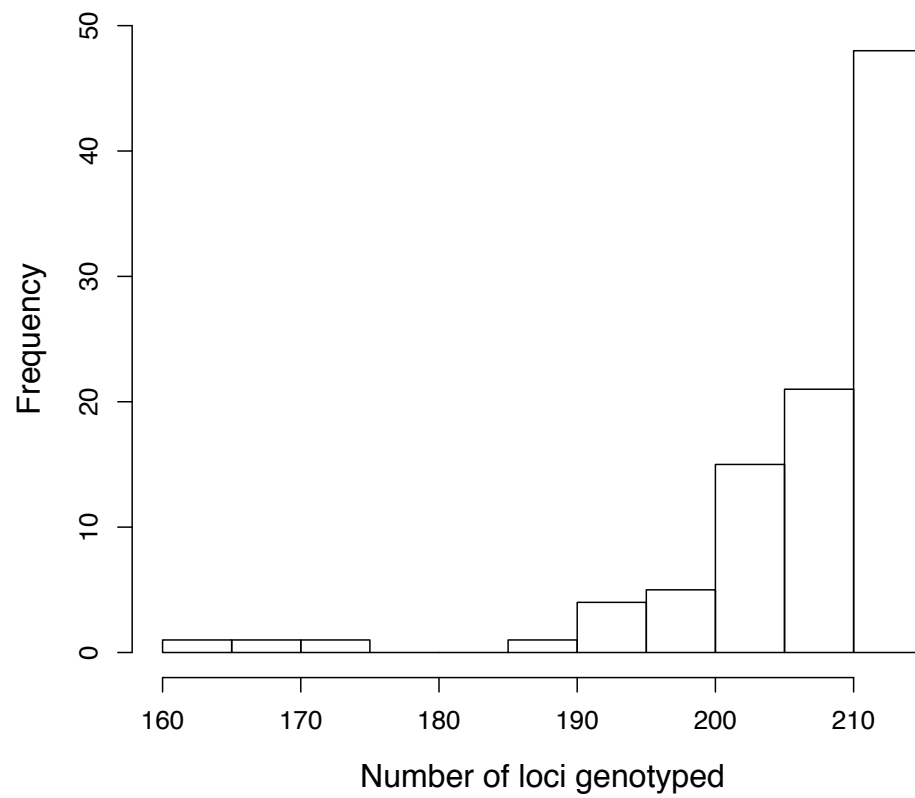

969

970 Figure S5. Number of species-specific SNPs scored per individual in a sample of 97 *Geum* plants from  
971 39 populations in Berwickshire.

972

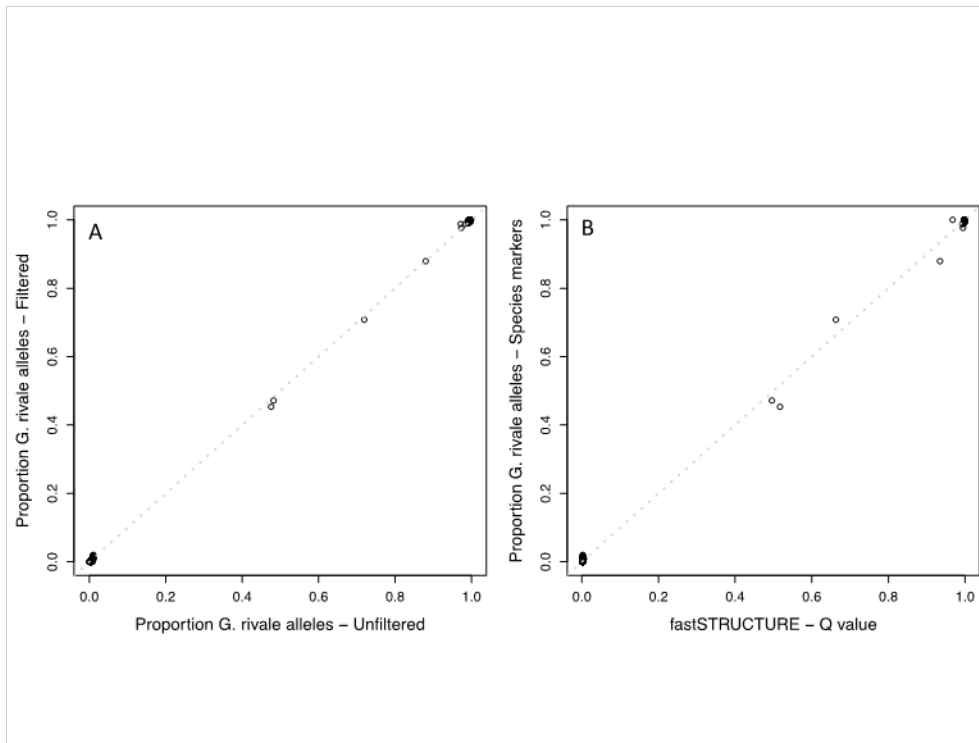

973

974 Figure S6. Genomic composition estimates for Berwickshire samples derived from paralog-filtered  
975 species-diagnostic SNPs (y-axis in both panels) compared to analogous measures in two alternate  
976 analyses: (A) species-diagnostic SNPs from data unfiltered for paralogs, and (B) Admixture  
977 proportion (Q value) calculated by fastSTRUCTURE analysis that required loci to be present in all  
978 individuals (188 SNPs).

979

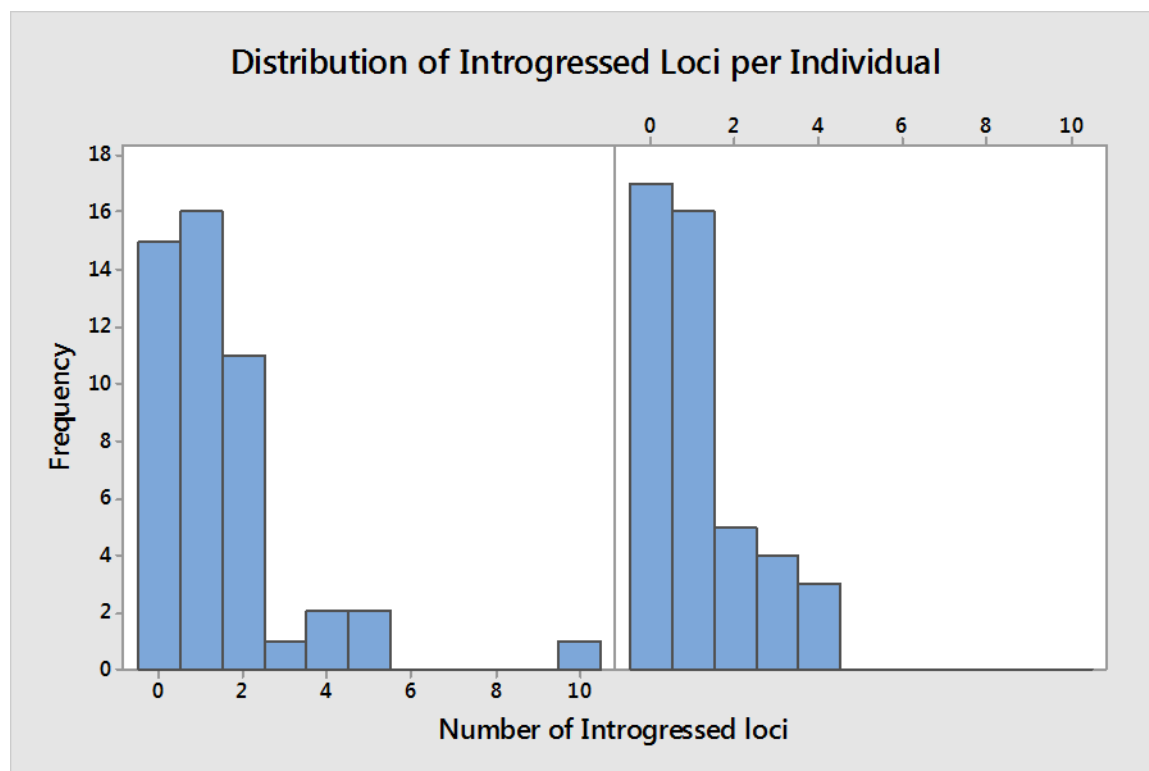

980

981 Figure S7. Number of putatively introgressed loci per individual in individuals classified as *G. rivale*  
982 (*G. rivale* (left panel) and *G. urbanum* (right panel) sampled from 39 populations in Berwickshire.
